1

2 **Rhizosphere bacterial communities of wheat vary across the**  
3 **growing season and among dryland farming systems.**

4

5

6 Suzanne L. Ishaq<sup>1\*</sup>, Tim Seipel<sup>1</sup>, Carl J. Yeoman<sup>2</sup>, Fabian D. Menalled<sup>1\*</sup>

7

8 <sup>1</sup> Montana State University, Department of Land Resources and Environmental Sciences,  
9 Bozeman MT, 59717

10 <sup>2</sup> Montana State University, Department of Animal and Range Sciences, Bozeman MT,  
11 59717

12

13 **Emails:**

14 SI: [sueishaq@uoregon.edu](mailto:sueishaq@uoregon.edu)

15 TS: [timothy.seipel@montana.edu](mailto:timothy.seipel@montana.edu)

16 CJY: [carl.yeoman@montana.edu](mailto:carl.yeoman@montana.edu)

17 FM: [Menalled@montana.edu](mailto:Menalled@montana.edu)

18

19 **\*Corresponding authors:**

20 Suzanne Ishaq, University of Oregon, Biology and the Built Environment Center, 103  
21 Pacific Hall, Eugene, OR 97403, [sueishaq@uoregon.edu](mailto:sueishaq@uoregon.edu)

22

23 Fabian Menalled, Montana State University, Department of Land Resources and  
24 Environmental Sciences, 211 Linfield Hall, Bozeman MT, 59717, [Menalled@montana.edu](mailto:Menalled@montana.edu)

25

26

27 **Keywords:** 16S rRNA gene, conventional, organic, tillage, grazing, weed diversity

28

29

30 **Abstract**

31           Despite knowledge that seasonality and plant phenology impact soil microbiota,  
32 farming system effects on soil microbiota are not often evaluated across the growing season.  
33 We assessed the bacterial diversity in wheat rhizosphere soil through the spring and  
34 summer of 2016 in winter wheat (*Triticum aestivum* L.) in Montana, USA, from three  
35 contrasting farming systems: a chemically-managed no-tillage system, and two USDA-  
36 certified organic systems in their fourth year, one including tillage and one where sheep  
37 grazing partially offsets tillage frequency. Bacterial richness (range 605 – 1174 OTUs) and  
38 evenness (range 0.80 – 0.92) peaked in early June and dropped by late July (range 92 –  
39 1190, 0.62-0.92, respectively), but was not different by farming systems. Organic tilled  
40 plots contained more putative nitrogen-fixing bacterial genera than the other two systems.  
41 Bacterial community similarities were significantly altered by sampling date, minimum  
42 and maximum temperature at sampling, bacterial abundance at date of sampling, total weed  
43 richness, and coverage of *Taraxacum officinale*, *Lamium amplexicaule*, and *Thlaspi*  
44 *arvense*. This study highlights that weed diversity, season, and farming management  
45 system all influence rhizosphere soil microbial communities. Local environmental  
46 conditions will strongly affect any practical applications aimed at improving soil diversity  
47 and functionality, especially in semi-arid regions where abiotic stress and seasonal  
48 variability in temperature and water availability drive primary production.

49

## 50 **1 Introduction**

51 Microbial communities in agricultural soil are influenced by myriad factors,  
52 broadly including seasonality and local environmental conditions, and management  
53 practices, and the interaction of these influences is understudied. In a dryland agricultural  
54 system, we investigated the interaction of farming system and environmental variables,  
55 such as soil moisture and temperature, on the bacterial community associated with the roots  
56 of winter wheat (*Triticum aestivum* L.) at various points along a growing season.

57 Seasonality may result in variations in temperature, precipitation, soil moisture, and  
58 solar radiation, all of which drive rates of soil microbial metabolism and respiration, as  
59 well as taxonomic composition (Koranda et al., 2013; Orr et al., 2012; Prevost-Boure et al.,  
60 2010; Wu et al., 2016). Likewise, environmental conditions alter plant phenology which,  
61 in turn, can impact changes in soil microbial communities within a growing season (Donn  
62 et al., 2015; Kumar et al., 2018; Sayer et al., 2017). Moreover, management practices,  
63 particularly those in agricultural systems, are strongly tied to seasonality (Morrison-  
64 Whittle and Goddard, 2015), yet the interplay of time and management on microbial  
65 community dynamics in soil has not been well described (Bossio et al., 1998).

66 Farming practices such as use of pesticides and fertilizers, tillage, crop rotation,  
67 irrigation, and the integration of crop and livestock operations directly select for specific  
68 microbial communities in soil (Chaudhry et al., 2012; Ishaq, 2017; Lori et al., 2017).  
69 Farming practices also indirectly influence soil microbial communities by influencing  
70 weed diversity and biomass, soil compaction, soil moisture and permeability, and  
71 arthropod populations (Cregger et al., 2012; Lennon et al., 2012; Ponce et al., 2011; Roger-  
72 Estrade et al., 2010). Root-associated soil microbial communities can dramatically affect

73 trophic interactions in natural and agricultural settings, by cycling organic material or by  
74 interfacing directly with plants to modulate plant growth, root exudates, and health status  
75 (Ishaq, 2017; Mariotte et al., 2017). Greater soil microbial phylogenetic diversity is  
76 generally considered beneficial for soil and plant health, as it allows for functional  
77 redundancy in the provision of ecosystem services, and for the stability and resiliency to  
78 disturbances (Bérard et al., 2011; Kuan et al., 2006; Orwin and Wardle, 2004).

79 Previous studies determined that in comparison with conventional (chemically-  
80 managed) no-till and conventional till systems, organic systems have higher soil bacterial  
81 cell density and total taxonomic diversity (Chaudhry et al., 2012; Ishaq et al., 2017;  
82 Pershina et al., 2015). Yet, many organic systems rely on mechanical tactics like tillage to  
83 control weeds. However, tillage use in dryland systems could result in soil erosion,  
84 moisture loss, and a change in the community structure of soil microbiota (Ishaq, 2017;  
85 Lehnhoff et al., 2017). While there are benefits and limitations of integrated crop-animal  
86 production systems (reviewed in (Thiessen Martens and Entz, 2011)), little has been  
87 reported on the effect of livestock grazing on soil microbiota. Further, much of that research  
88 has been in pasture-based systems where light stocking increases carbon and nitrogen, and  
89 sometimes increases bacterial but not fungal biomass (reviewed in (Ishaq, 2017)).

90 In the northern portion of the Great Plains of North America, wheat (*Triticum*  
91 *aestivum* L.) is the most widely-planted crop, but production is threatened by insects,  
92 climate change, and herbicide-resistant weeds (Keren et al., 2015; Lanning et al., 2010;  
93 Menalled et al., 2016). Beginning in 2012, a study has been conducted at the Montana  
94 State University Fort Ellis Research and Teaching Center, 3 km east of Bozeman, MT, to  
95 compare wheat production challenges across three dryland farming systems: 1) a

96 chemically-managed no-till, 2) an USDA-certified organic system utilizing tillage to  
97 manage weeds and terminate cover crops, and 3) an USDA-certified organic system where  
98 sheep (*Ovis aries*) grazing is used to manage weeds and terminate cover crops with the  
99 goal of reuducing tillage intensity.

100 In this study, we evaluated patterns in bacterial diversity across the three farming  
101 systems described above to elucidate the relative effects of management systems, soil  
102 moisture, nutrient content, wheat yield, as well as weed abunandace and diversity on the  
103 wheat rhizosphere soil bacterial communities. We hypothesized that 1) date within the  
104 growing season be the strongest determinant of bacterial diversity and community structure,  
105 2) farming systems would select for different bacterial communities over the entire  
106 growing season, and that 3) farming system would modulate the response of the bacterial  
107 community to environmental variables such as low moisture, high temperature, and plant  
108 senescence.

109

## 110 **2 Materials and methods**

### 111 **2.1 Site description**

112 Beginning in July 2012, a long-term agricultural field experiment was located at the  
113 Montana State University Fort Ellis Research and Teaching Center (45.652664056 N -  
114 110.97249611 W) to assess agronomic and ecological challenges of chemically-managed  
115 (i.e. ‘conventional’) and USDA-organic farming systems, as well as the integration of  
116 livestock into organic farming systems. Soils at the Fort Ellis site are a Blackmore silt loam  
117 (a fine-silty, mixed, superactive, frigid Typic Arguistoll) with 0 to 4% slopes and consistent  
118 ratio of 1 part sand, 2 parts silt, 1 part clay by weight (Miller and Menalled, 2015). Monthly

119 air temperature in Bozeman in 2016 was higher than historic maximum and minimums  
120 from 1981 – 2010, and mean monthly precipitation (Table S1) was lower by 18 mm in  
121 May, 16 mm June, and 14 mm in July (“PRISM Climate Group,” 2018).

122 The experiment followed a randomized split-plot design; using farming system as  
123 the main plot (90 x 75m) with three field replicates per farming system, and crop identity  
124 as the split-plot (90 x 13 m). Farming systems consisted of 1) chemical no-till system  
125 (CNT), in which synthetic inputs were used in the form of fertilizers, herbicides, and  
126 fungicides, 2) USDA-certified till organic (OT), and 3) USDA-certified organic with  
127 grazing (OG), which integrates sheep grazing to terminate cover crops and manage weeds,  
128 with the overall goal of minimizing tillage intensity in organic production. Split-plots were  
129 randomly assigned to a starting crop of a 5 yr crop rotation: year 1 – safflower (*Carthamus*  
130 *tinctorius* L.) under-sown to yellow sweet clover (*Melilotus officinalis* (L.) Lam.), year 2 –  
131 sweet clover cover crop, year 3 – winter wheat (*Triticum aestivum* L.), year 4 – lentil (*Lens*  
132 *culinaris* Medik.), and year 5 – winter wheat (Lehnhoff et al., 2017).

133 Chemical inputs utilized in the CNT system included 2,4-D, bromoxynil, dicamba,  
134 fluroxypyr, glyphosate, MCPA, pinoxaden, and urea for winter wheat rotations [see Tables  
135 2.7 and 2.8 in (Johnson, 2015)], which are reflective of typical farm management practices  
136 in the Northern Great Plains region. Both organic treatments began the organic transition  
137 process in July 2012, making crops harvested as of 2015 USDA-certified as organic. In  
138 the OT system, tillage was accomplished using a chisel plow, tandem disk, or field  
139 cultivator, as needed for weed control, seedbed preparation, and to incorporate cover crops  
140 and crop residues. Weed control was enhanced with a rotary harrow. In the OG system,  
141 targeted sheep grazing was used to reduce tillage intensity for pre-seeding and post-harvest

142 weed control and to terminate the cover crops, with duration and intensity of grazing based  
143 on weed biomass (Lehnhoff et al., 2017). Grazing was supplemented with tillage as  
144 necessary, based on soil conditions and weed pressure. Seeding was done with a low-  
145 disturbance no-till double-disk seeder. Further details of the management practices used  
146 within each system and farming history prior to planting of these crops can be found  
147 elsewhere (Barroso et al., 2015; Johnson, 2015; Lehnhoff et al., 2017). Outside of normal  
148 farm management activities, soil disturbance and compaction was minimized during  
149 sampling procedures.

150

## 151 **2.2 Soil measurements and collection**

152 In the present study, soil was sampled in the year 3 winter wheat split plots of each  
153 farming systems. Soil moisture was measured weekly using gypsum blocks (Friis Dela,  
154 2001) buried in the center of each sample area to a depth of 7.5 cm and a Delmhorst soil  
155 moisture tester (Model KS-D1, Delmhorst Instrument Co.). Every four hours between  
156 April 14, 2016 (one week prior to the first sampling) and July 25, 2016 (final sampling  
157 date), soil temperature was recorded within sample areas using an iButton (Maxim  
158 Integrated) buried at 7.5 cm.

159 To characterize soil microbial communities, rhizosphere soil cores were obtained  
160 from each one of the nine year 3 winter wheat split-plots, within an 0.75 m<sup>2</sup> area, situated  
161 randomly along the length of each 90-m split-plot. Three soil cores were obtained to a  
162 depth of 15 cm using a 2-cm diameter core sampler, which was sterilized with 70%  
163 isopropanol and air-dried between sample areas. and from each sample area. Soil (50 mL)  
164 was homogenized and placed on ice until transport back to Montana State University,

165 where they were stored at -20°C until analysis. Each area was repeatedly sampled five  
166 times during the 2016 growing season: April 21, May 12, June 1, June 22, and July 25  
167 (prior to wheat harvesting). Additional soil samples were obtained on July 25, and stored  
168 at 4°C until shipped to an independent laboratory (Agvise Laboratories, Northwood, North  
169 Dakota, US) for analysis of organic matter, nitrate, phosphorous (Olsen), potassium, and  
170 pH (Table S2).

171

### 172 **2.3 Plant community measurements and collection**

173 Aboveground biomass of all weed species present within sampled areas was  
174 harvested by hand in late June, when most weeds and wheat had matured. Weeds were  
175 visually identified and separated by species, dried in an oven at 55° C for two weeks, and  
176 weighed. Total wheat biomass was harvested from sampled areas by hand from 1.5 row  
177 meters on July 25, 2016, immediately after soil samples had been collected. Wheat biomass  
178 was dried in an oven for a week at 55° C, weighed, and then mechanically threshed to  
179 remove grain. The grain was submitted for protein analysis to the Montana State University  
180 Grain Quality Lab (Bozeman, MT).

181

### 182 **2.4 DNA extraction and sequencing**

183 DNA was extracted using 0.25 g of a 15 -30 g soil sample homogenized from at  
184 least 3 soil cores within the sample area and processed following protocols described in  
185 Ishaq et al. (2017) using the PowerSoil 96-well Soil DNA Isolation Kit (MoBio  
186 Laboratories, Inc.). Following extraction, an additional cleaning step was added: a 10%  
187 volume of 2M sodium acetate was added to each sample, followed by a 200% volume of



188 100% ethanol. Samples were vortexed and refrigerated overnight at -20°C to precipitate  
189 DNA, after which they were centrifuged at 16,000 x G for 5 min, supernatant was poured  
190 off, and sample tubes were air-dried. Pellets were washed with 100% ethanol, allowed to  
191 air dry again, and eluted into 100 µl of molecular-grade water. The V3-V4 region of the  
192 16S rRNA gene was PCR amplified using the KAPA HotStart PCR Kit (Kapa Biosystems,  
193 Wilmington, MA) with 10 µL Kappa HotStart Mastermix, 6 µL molecular-grade water, 1  
194 µL of each forward and reverse primer at 10 mM concentration, and 2 µL sample DNA.  
195 PCR protocol was as follows: 95° C for 3 min; 5 cycles of denaturation at 98° C for 20 sec,  
196 annealing at 52° C for 30 sec, elongation at 72° C for 45 sec; 25 cycles of denaturation at  
197 98° C for 20 sec, annealing at 60° C for 30 sec, elongation at 72° C for 45 sec. Primers  
198 included the MiSeq adaptors (A for forward, B for reverse), the sample index/barcodes, the  
199 two-nucleotide linker, and primers 341F (5'-CCTACGGGAGGCAGCAG-3') and 806R  
200 (5'-GGACTACHVGGGTWTCTAAT-3') (Caporaso et al., 2011). High-throughput  
201 sequencing was performed using an Illumina MiSeq (Illumina, San Diego, CA) and a 500-  
202 cycle V2 kit, with PhiX used as a positive control at a 10% spike-in, and molecular-grade  
203 sterilized water as a negative control. Sequencing output data can be found in the Sequence  
204 Read Archive (SRA) at NCBI under BioProject PRJNA383161.

205

## 206 **2.5 DNA data processing and analysis**

207 Bioinformatics were performed similar to previously described protocols (Ishaq et  
208 al., 2017) with a few exceptions. Forward and reverse DNA sequence fragments were  
209 assembled into contigs using PANDAseq (Masella et al., 2012) with > 15 nucleotide  
210 overlap and default quality parameters, then processed using mothur ver. 1.38 (Schloss et

211 al., 2009). Sequences that contained ambiguous bases, homopolymers > 8 nt, < 300 nt or  
212 > 580 nt, were discarded. Sequences were aligned to the Silva nr 119 database (Quast et  
213 al., 2013) using Needleman-Wunsch alignment (Needleman and Wunsch, 1970), after  
214 which all-blank columns and unaligned sequences were removed. Samples with > 50,000  
215 sequences were subsampled down to 50,000 to improve analysis time. Chimeras were  
216 identified and removed using mother-integrated UCHIME (Edgar et al., 2011), and then  
217 taxonomically classified with the Wang algorithm/Ribosomal Database Project (RDP)  
218 Classifier (Wang et al., 2007) and Silva reference database. Sequences identified as  
219 unknown, mitochondria, chloroplast, or Eukaryotic (< 500 combined) were removed.  
220 Sequences which were identified to genera known to contain nitrogen-fixing species in soil  
221 were identified from previous literature. The number of sequences per sample which passed  
222 QA ranged from 1,305 – 157,761.

223 Sequences were subsampled (normalized) to the size of the smallest sample (n =  
224 3232 sequences per sample), removing nine samples with fewer sequences each from  
225 downstream analysis. Distance was calculated considering consecutive gaps to be one  
226 event, and sequences were clustered into presumptive species-level operational taxonomic  
227 units (OTUs) using the nearest neighbor algorithm at a 0.03 cutoff. OTUs which only  
228 contained singletons or doubletons were removed. One sample sampled in July in OT  
229 (OT\_725\_114) contained a dramatically different microbial community than its replicates  
230 as it had more Firmicutes and Bacteroidetes and far fewer of any other phyla represented  
231 than other samples (included in Fig 4, S2), and was removed from all group-based  
232 statistical analysis.

233 Diversity was assessed using the mothur-integrated versions of Shannon Diversity  
234 (Segata et al., 2011), and multivariate analysis and data visualization was performed in R  
235 (RCoreTeam, 2018). Diversity data did not meet normality distribution assumptions via  
236 Shapiro-Wilks test, thus comparisons of means were conducted with non-parametric  
237 Conover tests (Dinno, 2017) using Bonferroni p value correction for multiple comparisons.  
238 Classification-based random forest trees with permutational analysis (rfPermute) were used  
239 to identify discriminant taxa, based on “mean decrease accuracy” or the importance of a  
240 factor in predicting the microbial community, as measured by randomly re-assigning factor  
241 levels and comparing to the original tree of microbial community distribution. Regression-  
242 based random forest trees were used to identify important factors for Shannon diversity of  
243 abundance of specific taxa (Breiman et al., 2018). The number of trees which minimized  
244 the out-of-box error rate was used, typically  $n_{tree} = 500$ .

245 Unweighted Jaccard distance (uJ) and Bray-Curtis Dissimilarity (BC) were  
246 calculated to compare community membership (presence/absence) and community  
247 structure (presence/absence and abundance), respectively, and assessed using  
248 permutational analysis of variance (PERMANOVA) with the Adonis function in the vegan  
249 package (Oksanen et al., 2012), or pairwise in the RVAideMemoire package (Herve, 2019),  
250 with Block to stratify data, split-plot as a repeated measure, 1,000 permutations, and  
251 Bonferroni p-value correction. There was heterogeneity in samples by replicate block,  
252 indicating a spatial difference in the soil conditions, which significantly affected bacterial  
253 communities (PERMANOVA, uJ,  $F = 4.498$ ,  $p = 0.001$ ; Bray-Curtis,  $F = 3.6676$ ,  $p = 0.001$ ),  
254 thus, all permutational calculations of distance included field replicate block as a  
255 stratification. Non-Metric Multidimensional Scaling Plots (NMDS) based off Bray-Curtis

256 Dissimilarity were calculated in *mothur* and were visualized using *ggplot2* (Wickham,  
257 2009). A heatmap of significant Pearson's correlations between treatment parameters and  
258 OTU abundance was created using *corrplot* (Wei et al., 2017), which generated correlations  
259 and tested significance.

260 Distance-based redundancy analysis (dbRDA) was conducted using Hellinger-  
261 transformed community data (Legendre and Gallagher, 2001) and the *capscale* function of  
262 the *vegan* package, using *Block* as a condition. The environmental data included  
263 categorical treatment levels; soil moisture at soil sampling; the minimum, maximum, and  
264 mean soil temperature on the day of soil sampling; the minimum, maximum and mean soil  
265 temperature averaged over 3 and 7 days prior to sampling. Biotic and abiotic (meta-) data  
266 also included bacterial Shannon diversity; total weed species, total weed coverage,  
267 individual weed species coverage, and wheat coverage the previous fall (October 25, 2015),  
268 early spring (April 8, 2016), and mid-summer (June 14, 2016), as well as weed biomass in  
269 mid-summer (June 14, 2016) and wheat biomass in late-summer (July 25, 2016).  
270 Additional significant variables were removed from the original model to create a reduced  
271 model, as they were co-linear aliases of included variables, including the biomass in June  
272 2016 of *C. pastoris*, *C. arvensis*, *Melilotus* spp., and *T. arvensis*, the plot coverage in April  
273 2016 of *C. album*, *G. aparine*, *L. serriola*, and *T. arvensis* plot coverage the previous fall in  
274 October 2015.

275 Each farming system contained a distinct weed community profile, and collectively  
276 the dominant weed species identified over all systems and time points included *Bromus*  
277 *tectorum* L., *Capsella bursa-pastoris* L., *Chenopodium album* L., *Cirsium arvensis* L.,  
278 *Galium aparine* L., *Lactuca serriola* L., *Lamium amplexicaule* L., *Lens culinaris*

279 (Medikus), *Malva neglecta* (Wallr.), *Melilotus officinalis* L., *Monolepsis nuttalliana*  
280 (Schult.), *Taraxacum officinale* L., *Thlaspi arvense* L., *Tragopogon dubius* (Scop.),  
281 *Trifolium hybridum* L., and *Trifolium pratense* L. Factors for which only one time point  
282 was present, such as wheat biomass, soil pH, and soil nutrients, all collected at harvest,  
283 were assessed for the July time point only. Additional information and analysis on wheat  
284 and weed data are provided elsewhere (Lehnhoff et al., 2017; Seipel et al., 2018). Across  
285 all tests, significance was determined at  $P < 0.05$

286

### 287 **3 Results**

288 The bacterial community in soil was comprised of Actinobacteria, Proteobacteria,  
289 and Acidobacteria, followed by Bacteroidetes, Firmicutes, Gemmatimonadates,  
290 Verrucomicrobia, and Planctomycetes, and several low-relative-abundance phyla (Fig. 1).  
291 Within each sampling date, the relative abundance of Acidobacteria, Actinobacteria,  
292 Armatimonadetes, Chlorobi, Chloroflexi, Cynaobacteria, Deinococcus-Thermus,  
293 Fibrobacteres, Firmicutes, Proteobacteria, and Verrucomicrobia, as well as the candidate  
294 phyla BD1-5, BRC1, SHA-109, SM2F11, TM7, WCHB1-60, and WS6 differed among  
295 farming systems (Fig. 1; Table S3,  $p < 0.05$ ). There was an increase in the mean coefficient  
296 of variation for the relative abundance of each phylum over the growing season (Fig. S1),  
297 indicating that there was more variation in field replicates as bacterial abundance was  
298 divergent across individual sample areas when soil was hottest and driest in July.

299 A total of 8,547 OTUs (97% cutoff) were identified, including many common soil  
300 genera which were abundant throughout the growing season in all plots, including  
301 *Blastococcus*, *Arthrobacter*, *Skermanella*, *Sphingomonas*, as well as unclassified genera

302 from several different families (Fig. S2). Other OTUs were specific to system, including  
303 *Bacteroides* which was prominent in OT sample 202 during July, and the insect-associated  
304 *Wolbachia* which was abundant only in a single CNT sampled area in May (Fig. S2).

305

### 306 **3.1 Seasonal effect**

307 The effect of sampling date was manifested by the unimodal trend of soil bacterial  
308 richness over the 2016 growing season. Across the three farming systems, observed OTU  
309 (97% cutoff) richness peaked in early June, when it was greater than in April, May, or July  
310 (Fig. 2 A, B; Conover,  $p < 0.05$  each, Bonferroni corrected (BF)). Richness was also  
311 greater in late June than in July (Fig. 2 A, B; Conover,  $p < 0.05$  each, BF). Similarly,  
312 Shannon-Weiner diversity index of soil bacteria peaked in early June when it was  
313 significantly higher than in April, May, late June, and July (Fig. 2C; Conover,  $p < 0.05$   
314 each, BF). This change in Shannon diversity over the growing season was driven by  
315 changing richness, rather than changes in evenness (Fig. 2D) which was only significantly  
316 increased in early June as compared to April (Conover,  $p = 0.004$ , BF).

317 Sampling date significantly affected bacterial community similarity based on  
318 member presence/absence collectively across the growing season (Table 1, uJ), but was  
319 not significantly altered in any pairwise sampling date comparison (uJ,  $p > 0.05$  BF),  
320 contrary to our first hypothesis. Sampling date similarly affected bacterial community  
321 similarity in relation to relative abundance (Fig. 3; Table 1, BC,  $p = 0.0001$ ), and was driven  
322 by significant differences between June and July (Table S4) when richness was low: early  
323 June - July ( $p = 0.014$ ), and late June-July ( $p = 0.022$ ).

324

## 325 3.2 Farming system

326 Farming system had an equivocal effect on community membership to sampling  
327 date during the growing season, and significantly affected both OTU presence/absence  
328 (Table 1, uJ), and membership with respect to relative abundance (Table 1, BC). The  
329 collective effects that farming system exerted upon soil bacterial communities was  
330 observed between CNT and OG plots (Table S5), both in presence/absence (uJ,  $F = 1.387$ ,  
331  $p = 0.01$ ), and weighted community structure (BC,  $F = 1.676$ ,  $p = 0.014$ ), indicating a  
332 difference in presence/absence as well as relative abundance, respectively. OG and OT  
333 contained significantly different communities by presence/absence (uJ,  $F = 1.41$ ,  $p = 0.011$ ).  
334 CNT and OT had only equivocally different presence/absence composition (uJ,  $p = 0.051$ ).

335 Richness, evenness, and Shannon Diversity were not significantly different  
336 between farming systems at any time point, or averaged across the growing season  
337 (Conover,  $p > 0.05$ , Bonferroni corrected (BF)). Thus, there was no significant difference  
338 on a pairwise basis between each farming system within each time point (Fig. 3;  
339 PERMANOVA uJ and BC,  $p > 0.05$ ). However, there was more variability in soil bacterial  
340 communities at the end of the growing season (betadisp, uJ and BC,  $p < 0.01$ ), there was  
341 no significant interaction between sampling date and farming system (PERMANOVA, uJ  
342 and BC,  $p > 0.05$ ; Table 1). There was no significant interaction between sampling date  
343 and farming system in soil microbial community clustering (PERMANOVA, BC and uJ,  
344  $p = 1$  BF).

345 Within the CNT and OG farming systems, a large number of OTUs were commonly  
346 sampled across the growing season: CNT samples shared 4,530 (53.0% of total OTUs),  
347 OG shared 4,536 (53.1% of total OTUs), and OT shared 4,207 OTUs (49.2% of total

348 OTUs). All farming systems shared 3,555 OTUs in April (54.3% of total), 3,086 OTUs in  
349 May (47.2% of total), 2,973 OTUs in early June (45.4% of total), 3,025 in late June (46.2%  
350 of total), and 2,043 in July (23.9% of total).

351 Random forest classification was not able to predict bacterial communities based  
352 on farming system (Fig 4; OOB estimate of error rate: 48%) or time point (not shown;  
353 OOB estimate of error rate: 69%) with reliably high accuracy. OT plots contained more  
354 putative nitrogen-fixing bacterial genera than OG or CNT (Fig. 5A). *Arthrobacter* was  
355 more abundant in organic plots across all time points, and particularly OT plots, though  
356 CNT plots contained more *Flavobacterium* and an unclassified 97%-cutoff OTU in the  
357 Bradyrhizobiaceae family (Fig. 5A). All but the least abundant genera were significantly  
358 ( $p < 0.05$ ) differential for farming system (Fig. 5B). Soil moisture, soil temperature, and  
359 total and individual weed species biomass were important predictors of *Arthrobacter*  
360 abundance (Fig. 5C).

361

### 362 **3.2 Plant community and environmental variables**

363 Biotic and abiotic variables affecting the soil bacterial communities included  
364 farming system, sampling date, minimum and maximum temperature on the day of  
365 sampling, total weed diversity on both April and June 2016, *Taraxacum officinale* percent  
366 coverage the previous fall in October 2015, *Lamium amplexicaule* percent coverage in  
367 April 2016, and *T. arvense* percent coverage in April 2016 (ANOVA,  $p < 0.05$ ; Fig. 6).

368 Only weak (-0.4 to 0.4) Pearson's correlations existed between bacterial Shannon  
369 diversity and various bacterial and weed species (Fig. S3,  $p < 0.05$ ), likely because most  
370 samples maintained a high Shannon Index (range 5.2 - 6.6). When separated out by



371 sampling date, the strength of the correlations between the top soil bacterial OTUs in early  
372 June (Fig. S4) and late June (Fig. S5,  $p < 0.05$ ) increased. Total Shannon diversity and  
373 abundance of many of the most-abundant bacterial OTUs were negatively correlated with  
374 increased soil temperature at respective date of sampling (Fig. S6,  $p < 0.05$ ). However,  
375 *Arthrobacter*, *Skermanella*, *Sphingomonas*, Comamonadaceae, *Bacteroides*, *Arenimonas*,  
376 and *Microvirga* were positively correlated with soil temperature (Fig. S6,  $p < 0.05$ ). Soil  
377 moisture on the day of sampling was positively correlated with the most-abundant bacterial  
378 OTUs, but showed a weakly-positive correlation with Shannon diversity (Fig. S6,  $p < 0.05$ ).

379 Soil pH was negatively associated with a number of bacterial genera, as was wheat  
380 protein (Fig. S7, Pearson's correlations,  $p < 0.05$ ). Soil pH was lower in CNT than OG  
381 (ANOVA,  $p < 0.05$ ); CNT (mean 5.9), OG (mean 7.00), OT (mean 6.77). Nitrate was  
382 negatively associated with the putative genus 480-2, an unnamed clade in the  
383 Actinobacteria phylum (Fig. S7). Organic matter was not correlated with any of the most-  
384 abundant bacterial OTUs identified in July soils, but nitrate was strongly negatively  
385 associated with the putative genus 480-2 (order Solirubrobacterales, phylum  
386 Actinobacteria) (Fig. S7).

387

#### 388 **4 Discussion**

389 Agricultural production in the Great Plains of North America is strongly tied to  
390 seasonality, which alters temperature, moisture, solar radiation, and plant phenology.  
391 Wheat (*Triticum aestivum* L.) is the most widely-planted crop, and understanding the  
392 dynamics between production, soil microbial communities, and farming system, separately  
393 and with respect to seasonality, is important to continued sustainability. This research

394 assessed the impact of management systems and time within the growing season on the  
395 status of bacterial communities in three contrasting dryland farming systems: a chemically-  
396 managed no-till system and two organic farming systems that were maintained for four  
397 years under USDA-organic prescribed conditions.

398

#### 399 **4.1 Farming system over the growing season**

400 Farming systems selected for different bacterial communities, which has been well-  
401 established at single time-points, however we did not find significant farming system x  
402 time effects. Transitioning a farm to a USDA organic-certified system takes just three  
403 years to complete legally, yet it has been noted that soil microbial systems may take years  
404 to decades to transition to a new, stable community (Chaudhry et al., 2012; Hartmann et  
405 al., 2015; Sayer et al., 2017; Stagnari et al., 2014). Thus, the studied soil bacterial  
406 communities can be considered to be in transition, but, to our knowledge, the changes in  
407 soil microbial communities occurring during that transition or in recently certified organic  
408 system are unknown. However, the relevance of our study resides in the fact that the  
409 sampled organic fields represent certified systems from which farmers could perceive a  
410 significant economic premium (Lawrence et al., 2018; Miller et al., 2007). Variations in  
411 the soil bacterial community, including a reduction in total taxonomic diversity and a shift  
412 in abundance towards particular taxa, resulting from a change in management system  
413 occurs on a shorter time scale, (Lupwayi et al., 2004; Stagnari et al., 2014) compared with  
414 soil fungal communities (Stagnari et al., 2014). Nevertheless neither soil bacterial and  
415 fungal communities may reach a steady state for a long time, if ever, depending on the  
416 specific disturbance regime associated with in the agricultural system where they occur.

417 Further, even after just four years under these management practices, we saw changes in  
418 the soil bacterial community.

419 In this study, soil from the OG system exhibited less variation between plots in  
420 bacterial species richness and moisture later into the growing season than the plots from  
421 the OT system, and a neutral pH compared to the CNT systems. In July, more dispersion  
422 was observed in community clustering, and in particular, OT plots had highly variable  
423 mean evenness and richness between field replicates in July. This suggests a random  
424 divergence of the bacterial community rather than a selective pressure in those plots at that  
425 time. These differences may suggest that farming system may mediate the effects of the  
426 environment, per our third hypothesis. Yet, the lack of strong community divergence by  
427 farming system would suggest that the effects of environment may supersede the selective  
428 effects of farming, or else that the farming systems, though past USDA certification, had  
429 not been implemented long enough to significantly alter bacterial communities in the soil.  
430 However, many of our time x farming system comparisons lacked significance, possibly  
431 due to the variability in OT plots, or too few replicates. The effect of time within the  
432 growing season on soil microbial community dynamics is not well studied (DeBruyn et al.,  
433 2011; Marine et al., 2015).

434

### 435 **4.3 Plant community and environmental effects over the growing season**

436 July in Montana is very hot and dry, so much so that all three farming systems  
437 exhibited similarly low moisture levels. The unimodal nature of bacterial richness and  
438 evenness in all systems coincides with peak crop growth, and the reduction in July  
439 corresponds with both the weather and crop senescence, both of which would affect

440 microbial communities. Bacterial community structure in soil varies seasonally, reflecting  
441 seasonal changes in plant phenology, solar radiation, moisture or temperature, all strong  
442 drivers of bacterial species richness (Prevost-Boure et al., 2010; Wu et al., 2016). Bacterial  
443 activity, such as nitrogen fixation, is also strongly tied to soil moisture (Koranda et al.,  
444 2013; Orr et al., 2012). In our study, soil moisture was not a significant factor structuring  
445 the entire soil bacterial community, which may reflect the prevalence of relic DNA in soils  
446 (Carini et al., 2017). However, moisture was an important predictor of the abundance of  
447 the genus *Arthrobacter*, some members of which are nitrogen-fixers (Westerberg et al.,  
448 2000), and which are reported to thrive in adverse conditions, including low moisture and  
449 high radiation conditions (Mongodin et al., 2006; SantaCruz-Calvo et al., 2013). Further,  
450 numerous *Arthrobacter* species are adept at using various carbon sources, including  
451 pesticides (Hagedorn and Holt, 1975). This is in contrast to other nitrogen-fixers, which  
452 are susceptible to pesticide toxicity (Orr et al., 2012).

453         Changes in weed diversity has been found to correlate with soil bacterial diversity  
454 throughout the year (Aguilera et al., 2017; Cardinale et al., 2015; Grayston et al., 1998;  
455 Ishaq et al., 2017; Whiting et al., 2001). Contrary to previous studies, (Flohre et al., 2011;  
456 Kubota et al., 2015) though, bacterial richness was positively correlated with total weed  
457 diversity only in April and weakly negatively correlated with total weed diversity in June,  
458 which was driven by the interaction between bacteria and several plant species. In  
459 agreement with the present study, *T. arvense* has been found to be associated with low  
460 bacterial diversity in soil (Whiting et al., 2001), possibly because members of the  
461 Brassicaceae family of plants produce a number of glucosinolates and other antimicrobial  
462 compounds (Pal Vig et al., 2009), which may inhibit microbial growth in the rhizosphere.

463 Similarly, and in accordance with (Cardinale et al., 2015), *L. serricola* was associated with  
464 low soil bacterial relative abundance.

465 Previous studies have shown that some weed species are better at recruiting  
466 beneficial microbiota than domesticated crops, allowing them to be more competitive  
467 (Aguilera et al., 2017; Massenssini et al., 2015; Trognitz et al., 2016). Recent discussions  
468 have examined the possibility that weed species are more dependent on plant-microbial  
469 connections, while crops only need them under non-ideal growing conditions (Trognitz et  
470 al., 2016). Also, it has been shown that plants will reprioritize microbial interactions under  
471 stressful conditions (Fuchslueger et al., 2014). However, seasonal changes in moisture or  
472 nutrient availability, as well as plant phenology, dictate the need for plants to form  
473 symbiotic relationships with soil microbiota (Fuchslueger et al., 2014; Kumar et al., 2018),  
474 thus the interaction between plant species and microbial species may be uncoupled at  
475 certain points of the year, i.e. at plant senescence.

476

#### 477 **4.4 Summary**

478 In the context of these recent studies, our results raise speculative but interesting  
479 questions for the sustainability of managed systems; how does soil bacterial diversity  
480 impact crop-weed competitive interactions under stressed and ideal environmental  
481 situations? Does the degree of these dependences vary across farming systems (Johnson et  
482 al., 2017)? What are the mechanisms driving the impact of soil microbial communities on  
483 plant growth and multi-trophic interactions? Local environmental conditions strongly  
484 affect any practical applications aimed at improving soil diversity and functionality,  
485 especially in semi-arid regions where abiotic stress and seasonal variability in temperature

486 and water availability drive primary production. Thus, it is imperative to incorporate  
487 seasonality into studies on the microbial ecology of agricultural systems.

488

## 489 **5 Acknowledgements**

490 The authors would like to thank Kyla Crisp, Madison Nixon, Tessa Scott, Rachel Flowers,  
491 Ali Thornton, and Lazaro Vinola for their assistance maintaining the plots and collecting  
492 samples; Devon Ragen for sheep maintenance; Drs. Pat Hatfield and Perry Miller for farm  
493 administration; and Sarah Olivo for DNA sequencing. This work was supported by the  
494 USDA NIFA Organic Transitions (ORG) program (Grant MONB00128).

495

## 496 **6 References**

497 Aguilera, A.G., Morey, S., Gammon, M., Jiang, M., Ramos, S., Kesseli, R., 2017. Effect  
498 of plant-soil feedbacks on the growth and competition of *Lactuca* species. *Plant Ecol.*  
499 218, 359–372.

500 Barroso, J., Miller, Z.J., Lehnhoff, E.A., Hatfield, P.G., Menalled, F.D., 2015. Impacts of  
501 cropping system and management practices on the assembly of weed communities.  
502 *Weed Res.* 55, 426–435. <https://doi.org/10.1111/wre.12155>

503 Bérard, A., Bouchet, T., Sévenier, G., Pablo, A.L., Gros, R., 2011. Resilience of soil  
504 microbial communities impacted by severe drought and high temperature in the  
505 context of Mediterranean heat waves. *Eur. J. Soil Biol.* 47, 333–342.  
506 <https://doi.org/10.1016/j.ejsobi.2011.08.004>

507 Bossio, D.A., Scow, K.M., Gunapala, N., Graham, K.J., 1998. Determinants of Soil  
508 Microbial Communities: Effects of Agricultural Management, Season, and Soil Type  
509 on Phospholipid Fatty Acid Profiles on JSTOR. *Microb. Ecol.* 36, 1–12.

510 Breiman, L., Cutler, A., Liaw, A., Wiener, M., 2018. Breiman and Cutler’s Random Forests

511 for Classification and Regression. <https://doi.org/10.1023/A:1010933404324>>

512 Caporaso, J.G., Lauber, C.L., Walters, W.A., Berg-Lyons, D., Lozupone, C.A., Turnbaugh,  
513 P.J., Fierer, N., Knight, R., 2011. Global patterns of 16S rRNA diversity at a depth of  
514 millions of sequences per sample. *Proc Natl Acad Sci USA* 108, 4516–4522.  
515 <https://doi.org/10.1073/pnas.1000080107>

516 Cardinale, M., Grube, M., Erlacher, A., Quehenberger, J., Berg, G., 2015. Bacterial  
517 networks and co-occurrence relationships in the lettuce root microbiota. *Environ.*  
518 *Microbiol.* 17, 239–252. <https://doi.org/10.1111/1462-2920.12686>

519 Carini, P., Marsden, P.J., Leff, J.W., Morgan, E.E., Strickland, M.S., Fierer, N., 2017. Relic  
520 DNA is abundant in soil and obscures estimates of soil microbial diversity. *Nat.*  
521 *Microbiol.* 2, 16242. <https://doi.org/10.1038/nmicrobiol.2016.242>

522 Chaudhry, V., Rehman, A., Mishra, A., Chauhan, P.S., Nautiyal, C.S., 2012. Changes in  
523 bacterial community structure of agricultural land due to long-term organic and  
524 chemical amendments. *Microb. Ecol.* 64, 450–60. [https://doi.org/10.1007/s00248-](https://doi.org/10.1007/s00248-012-0025-y)  
525 [012-0025-y](https://doi.org/10.1007/s00248-012-0025-y)

526 Cregger, M.A., Schadt, C.W., McDowell, N.G., Pockman, W.T., Classen, A.T., 2012.  
527 Response of the soil microbial community to changes in precipitation in a semiarid  
528 ecosystem. *Appl. Environ. Microbiol.* 78, 8587–94.  
529 <https://doi.org/10.1128/AEM.02050-12>

530 DeBruyn, J.M., Nixon, L.T., Fawaz, M.N., Johnson, A.M., Radosevich, M., 2011. Global  
531 biogeography and quantitative seasonal dynamics of Gemmatimonadetes in soil. *Appl.*  
532 *Environ. Microbiol.* 77, 6295–300. <https://doi.org/10.1128/AEM.05005-11>

533 Dinno, A., 2017. Conover-Iman Test of Multiple Comparisons Using Rank Sums.



- 534 Donn, S., Kirkegaard, J.A., Perera, G., Richardson, A.E., Watt, M., 2015. Evolution of  
535 bacterial communities in the wheat crop rhizosphere. *Environ. Microbiol.* 17, 610–  
536 621. <https://doi.org/10.1111/1462-2920.12452>
- 537 Edgar, R.C., Haas, B.J., Clemente, J.C., Quince, C., Knight, R., 2011. UCHIME improves  
538 sensitivity and speed of chimera detection. *Bioinformatics* 27, 2194–2200.  
539 <https://doi.org/10.1093/bioinformatics/btr381>
- 540 Flohre, A., Rudnick, M., Traser, G., Tscharnke, T., Eggers, T., 2011. Does soil biota  
541 benefit from organic farming in complex vs. simple landscapes? *Agric. Ecosyst.*  
542 *Environ.* 141, 210–214. <https://doi.org/10.1016/j.agee.2011.02.032>
- 543 Friis Dela, B., 2001. Measurement of soil moisture using gypsum blocks. Hørsholm.
- 544 Fuchslueger, L., Bahn, M., Fritz, K., Hasibeder, R., Richter, A., 2014. Experimental  
545 drought reduces the transfer of recently fixed plant carbon to soil microbes and alters  
546 the bacterial community composition in a mountain meadow. *New Phytol.* 201, 916–  
547 27. <https://doi.org/10.1111/nph.12569>
- 548 Grayston, S.J., Wang, S.Q., Campbell, C.D., Edwards, A.C., 1998. Selective influence of  
549 plant species on microbial diversity in the rhizosphere. *Soil Biol. Biochem.* 30, 369–  
550 378. [https://doi.org/10.1016/s0038-0717\(97\)00124-7](https://doi.org/10.1016/s0038-0717(97)00124-7)
- 551 Hagedorn, C., Holt, J.G., 1975. A nutritional and taxonomic survey of *Arthrobacter* soil  
552 isolates. *Can. J. Microbiol.* 21, 353–61.
- 553 Hartmann, M., Frey, B., Mayer, J., Mäder, P., Widmer, F., 2015. Distinct soil microbial  
554 diversity under long-term organic and conventional farming. *ISME J.* 9, 1177–1194.  
555 <https://doi.org/10.1038/ismej.2014.210>
- 556 Herve, M., 2019. RVAideMemoire package.

- 557 Ishaq, S.L., 2017. Plant-microbial interactions in agriculture and the use of farming systems  
558 to improve diversity and productivity. *AIMS Microbiol.* 3, 335–353.  
559 <https://doi.org/10.3934/microbiol.2017.2.335>
- 560 Ishaq, S.L., Johnson, S.P., Miller, Z.J., Lehnhoff, E.A., Olivo, S., Yeoman, C.J., Menalled,  
561 F.D., 2017. Impact of cropping systems, soil inoculum, and plant species identity on  
562 soil bacterial community structure. *Microb. Ecol.* 73, 417–434.  
563 <https://doi.org/10.1007/s00248-016-0861-2>
- 564 Johnson, S.P., 2015. Effects of organic and conventional cropping systems on plant  
565 diversity and plant soil feedbacks. Montana State University - Bozeman, College of  
566 Agriculture.
- 567 Johnson, S.P., Miller, Z., Lehnhoff, E., Miller, P., Menalled, F.D., 2017. Cropping systems  
568 modify the impacts of biotic plant-soil feedbacks on wheat (*Triticum aestivum* L.)  
569 growth and competitive ability. *Weed Res.* 57, 6–15.
- 570 Keren, I.N., Menalled, F.D., Weaver, D.K., Robison-Cox, J.F., 2015. Interacting  
571 agricultural pests and their effect on crop yield: application of a Bayesian decision  
572 theory approach to the joint management of *Bromus tectorum* and *Cephus cinctus*.  
573 *PLoS One* 10, e0118111. <https://doi.org/10.1371/journal.pone.0118111>
- 574 Koranda, M., Kaiser, C., Fuchslueger, L., Kitzler, B., Sessitsch, A., Zechmeister-  
575 Boltenstern, S., Richter, A., 2013. Seasonal variation in functional properties of  
576 microbial communities in beech forest soil. *Soil Biol. Biochem.* 60, 95–104.  
577 <https://doi.org/10.1016/j.soilbio.2013.01.025>
- 578 Kuan, H.L., Fenwick, C., Glover, L.A., Griffiths, B.S., Ritz, K., 2006. Functional resilience  
579 of microbial communities from perturbed upland grassland soils to further persistent

580 or transient stresses. *Soil Biol. Biochem.* 38, 2300–2306.

581 <https://doi.org/10.1016/j.soilbio.2006.02.013>

582 Kubota, H., Quideau, S.A., Hucl, P.J., Spaner, D.M., 2015. The effect of weeds on soil

583 arbuscular mycorrhizal fungi and agronomic traits in spring wheat (*Triticum aestivum*

584 L.) under organic management in Canada. *Can. J. Plant Sci.* 95, 615–627.

585 <https://doi.org/10.4141/cjps-2014-284>

586 Kumar, A., Shahbaz, M., Blagodatskaya, E., Kuzyakov, Y., Pausch, J., 2018. Maize

587 phenology alters the distribution of enzyme activities in soil: Field estimates. *Appl.*

588 *Soil Ecol.* 125, 233–239. <https://doi.org/10.1016/J.APSOIL.2018.02.001>

589 Lanning, S.P., Kephart, K., Carlson, G.R., Eckhoff, J.E., Stougaard, R.N., Wichman, D.M.,

590 Martin, J.M., Talbert, L.E., 2010. Climatic change and agronomic performance of

591 Hard Red Spring Wheat from 1950 to 2007. *Crop Sci.* 50, 835.

592 <https://doi.org/10.2135/cropsci2009.06.0314>

593 Lawrence, P.G., Maxwell, B.D., Rew, L.J., Ellis, C., Bekkerman, A., 2018. Vulnerability

594 of dryland agricultural regimes to economic and climatic change. *Ecol. Soc.* 23, art34.

595 <https://doi.org/10.5751/ES-09983-230134>

596 Legendre, P., Gallagher, E.D., 2001. Ecologically meaningful transformations for

597 ordination of species data. *Oecologia* 129, 271–280.

598 <https://doi.org/10.1007/s004420100716>

599 Lehnhoff, E., Miller, Z., Miller, P., Johnson, S., Scott, T., Hatfield, P., Menalled, F., 2017.

600 Organic agriculture and the quest for the Holy Grail in water-limited ecosystems:

601 managing weeds and reducing tillage intensity. *Agriculture* 7, 33.

602 <https://doi.org/10.3390/agriculture7040033>

- 603 Lennon, J.T., Aanderud, Z.T., Lehmkuhl, B.K., Schoolmaster, D.R., 2012. Mapping the  
604 niche space of soil microorganisms using taxonomy and traits. *Ecology* 93, 1867–79.
- 605 Lori, M., Symnaczyk, S., Mäder, P., De Deyn, G., Gattinger, A., 2017. Organic farming  
606 enhances soil microbial abundance and activity—A meta-analysis and meta-  
607 regression. *PLoS One* 12, e0180442. <https://doi.org/10.1371/journal.pone.0180442>
- 608 Lupwayi, N.Z., Harker, K.N., Clayton, G.W., Turkington, T.K., Rice, W.A., O’Donovan,  
609 J.T., 2004. Soil microbial biomass and diversity after herbicide application. *Can. J.*  
610 *Plant Sci.* 84, 677–685. <https://doi.org/10.4141/P03-121>
- 611 Marine, S.C., Pagadala, S., Wang, F., Pahl, D.M., Melendez, M. V, Kline, W.L., Oni, R.A.,  
612 Walsh, C.S., Everts, K.L., Buchanan, R.L., Micallef, S.A., 2015. The growing season,  
613 but not the farming system, is a food safety risk determinant for leafy greens in the  
614 mid-Atlantic region of the United States. *Appl. Environ. Microbiol.* 81, 2395–407.  
615 <https://doi.org/10.1128/AEM.00051-15>
- 616 Mariotte, P., Mehrabi, Z., Bezemer, T.M., De Deyn, G.B., Kulmatiski, A., Drigo, B., Veen,  
617 G.F. (Ciska), van der Heijden, M.G.A., Kardol, P., 2017. Plant–soil feedback:  
618 bridging natural and agricultural sciences. *Trends Ecol. Evol.* xx, 1–14.  
619 <https://doi.org/10.1016/j.tree.2017.11.005>
- 620 Masella, A.P., Bartram, A.K., Truszkowski, J.M., Brown, D.G., Neufeld, J.D., 2012.  
621 PANDAsq: paired-end assembler for Illumina sequences. *BMC Bioinformatics* 13,  
622 31. <https://doi.org/10.1186/1471-2105-13-31>
- 623 Massensini, A.M., Bonduki, V.H.A., Melo, C.A.D., Tótola, M.R., Ferreira, F.A., Costa,  
624 M.D., 2015. Relative importance of soil physico-chemical characteristics and plant  
625 species identity to the determination of soil microbial community structure. *Appl. Soil*

- 626 Ecol. 91, 8–15. <https://doi.org/10.1016/J.APSSOIL.2015.02.009>
- 627 Menalled, F., Peterson, R., Smith, R., Curran, W., Páez, D., Maxwell, B., 2016. The eco-  
628 evolutionary imperative: revisiting weed management in the midst of an herbicide  
629 resistance crisis. Sustainability 8, 1297. <https://doi.org/10.3390/su8121297>
- 630 Miller, P.R., Bekkerman, A., Hatfield, P., Menalled, F., Walker, R., Ward, L., Zabinski, C.,  
631 Glunk, E.C., 2007. Integrated Crop Livestock Research in Montana Challenges and  
632 Challenges., in: ASA-CSSA-SSSA. Tampa, FL, pp. 222–1.
- 633 Miller, Z.J., Menalled, F.D., 2015. Impact of species identity and phylogenetic relatedness  
634 on biologically-mediated plant-soil feedbacks in a low and a high intensity  
635 agroecosystem. Plant Soil 389, 171–183. <https://doi.org/10.1007/s11104-014-2336-x>
- 636 Mongodin, E.F., Shapir, N., Daugherty, S.C., DeBoy, R.T., Emerson, J.B., Shvartzbeyn,  
637 A., Radune, D., Vamathevan, J., Riggs, F., Grinberg, V., Khouri, H., Wackett, L.P.,  
638 Nelson, K.E., Sadowsky, M.J., 2006. Secrets of soil survival revealed by the genome  
639 sequence of *Arthrobacter aurescens* TC1. PLoS Genet. 2, e214.  
640 <https://doi.org/10.1371/journal.pgen.0020214>
- 641 Morrison-Whittle, P., Goddard, M.R., 2015. Quantifying the relative roles of selective and  
642 neutral processes in defining eukaryotic microbial communities. ISME J. 9, 2003–11.  
643 <https://doi.org/10.1038/ismej.2015.18>
- 644 Needleman, S.B., Wunsch, C.D., 1970. A general method applicable to the search for  
645 similarities in the amino acid sequence of two proteins. J Mol Biol 48, 443–453.  
646 [https://doi.org/10.1016/0022-2836\(70\)90057-4](https://doi.org/10.1016/0022-2836(70)90057-4)
- 647 Oksanen, J., Kindt, F.G.B.R., Legendre, P., Minchin, P.R., O’Hara, R.B., Simpson, G.L.,  
648 Solymos, P., Stevens, M.H.H., Wagner, H., 2012. R community ecology package.

- 649 Orr, C.H., Leifert, C., Cummings, S.P., Cooper, J.M., 2012. Impacts of organic and  
650 conventional crop management on diversity and activity of free-living nitrogen fixing  
651 bacteria and total bacteria are subsidiary to temporale effects. PLoS One 7, e52891.  
652 <https://doi.org/10.1371/journal.pone.0052891>
- 653 Orwin, K.H., Wardle, D.A., 2004. New indices for quantifying the resistance and resilience  
654 of soil biota to exogenous disturbances. Soil Biol. Biochem. 36, 1907–1912.  
655 <https://doi.org/10.1016/j.soilbio.2004.04.036>
- 656 Pal Vig, A., Rampal, G., Singh Thind, T., Arora, S., 2009. Bio-protective effects of  
657 glucosinolates – A review. LWT - Food Sci. Technol. 42, 1561–1572.  
658 <https://doi.org/10.1016/j.lwt.2009.05.023>
- 659 Pershina, E., Valkonen, J., Kurki, P., Ivanova, E., Chirak, E., Korvigo, I., Provorov, N.,  
660 Andronov, E., 2015. Comparative analysis of prokaryotic communities associated  
661 with organic and conventional farming systems. PLoS One 10, e0145072.  
662 <https://doi.org/10.1371/journal.pone.0145072>
- 663 Ponce, C., Bravo, C., de León, D.G., Magaña, M., Alonso, J.C., 2011. Effects of organic  
664 farming on plant and arthropod communities: A case study in Mediterranean dryland  
665 cereal. Agric. Ecosyst. Environ. 141, 193–201.  
666 <https://doi.org/10.1016/J.AGEE.2011.02.030>
- 667 Prevost-Boure, N.C., Maron, P.-A., Ranjard, L., Nowak, V., Dufrene, E., Damesin, C.,  
668 Soudani, K., Lata, J.-C., 2010. Seasonal dynamics of the bacterial community in forest  
669 soils under different quantities of leaf litter. Appl. Soil Ecol. 47, 14–23.  
670 <https://doi.org/10.1016/j.apsoil.2010.11.006>
- 671 PRISM Climate Group [WWW Document], 2018. . Oregon State Univ. URL

- 672 <http://www.prism.oregonstate.edu/> (accessed 5.30.18).
- 673 Quast, C., Pruesse, E., Yilmaz, P., Gerken, J., Schweer, T., Yarza, P., Peplies, J., Glöckner,  
674 F.O., 2013. The SILVA ribosomal RNA gene database project: improved data  
675 processing and web-based tools. *Nucl Acids Res* 41, D590–D596.  
676 <https://doi.org/10.1093/nar/gks1219>
- 677 RCoreTeam, 2018. R: a language and environment for statistical computing.
- 678 Roger-Estrade, J., Anger, C., Bertrand, M., Richard, G., 2010. Tillage and soil ecology:  
679 Partners for sustainable agriculture. *Soil Tillage Res.* 111, 33–40.  
680 <https://doi.org/10.1016/j.still.2010.08.010>
- 681 SantaCruz-Calvo, L., González-López, J., Manzanera Correspondence Manzanera  
682 manzanera, M.M., 2013. *Arthrobacter siccitolerans* sp. nov., a highly desiccation-  
683 tolerant, xeroprotectant-producing strain isolated from dry soil. *IJSEM* 63, 4174–4180.  
684 <https://doi.org/10.1099/ijms.0.052902-0>
- 685 Sayer, E.J., Oliver, A.E., Fridley, J.D., Askew, A.P., Mills, R.T.E., Grime, J.P., 2017. Links  
686 between soil microbial communities and plant traits in a species-rich grassland under  
687 long-term climate change. *Ecol. Evol.* 7, 855–862. <https://doi.org/10.1002/ece3.2700>
- 688 Schloss, P.D., Westcott, S.L., Ryabin, T., Hall, J.R., Hartmann, M., Hollister, E.B.,  
689 Lesniewski, R.A., Oakley, B.B., Parks, D.H., Robinson, C.J., Sahl J W, Stres B,  
690 Thallinger G G, Van Horn, D.J., Weber, C.F., 2009. Introducing mothur: Open-source,  
691 platform-independent, community-supported software for describing and comparing  
692 microbial communities. *Appl. Environ. Microbiol.* 75, 7537–7541.  
693 <https://doi.org/10.1128/AEM.01541-09>
- 694 Segata, N., Izard, J., Waldron, L., Gevers, D., Miropolsky, L., Garrett, W.S., Huttenhower,

- 695 C., 2011. Metagenomic biomarker discovery and explanation. *Genome Bio* 12, R60.
- 696 Seipel, T., Ishaq Pellegrini, S., Menalled, F., 2018. The effect of climate conditions on  
697 weed competition and wheat yields in the Northern Great Plains, in: Proceedings of  
698 the Western Society of Weed Science. Western Society of Weed Science, Garden  
699 Grove, CA.
- 700 Stagnari, F., Perpetuini, G., Tofalo, R., Campanelli, G., Leteo, F., Della Vella, U., Schirone,  
701 M., Suzzi, G., Pisante, M., 2014. Long-term impact of farm management and crops  
702 on soil microorganisms assessed by combined DGGE and PLFA analyses. *Front.*  
703 *Microbiol.* 5, 644. <https://doi.org/10.3389/fmicb.2014.00644>
- 704 Thiessen Martens, J., Entz, M., 2011. Integrating green manure and grazing systems: A  
705 review. *Can. J. Plant Sci.* 91, 811–824. <https://doi.org/10.4141/cjps10177>
- 706 Trognitz, F., Hackl, E., Widhalm, S., Sessitsch, A., 2016. The role of plant–microbiome  
707 interactions in weed establishment and control. *FEMS Microbiol. Ecol.* 92, fiw138.  
708 <https://doi.org/10.1093/femsec/fiw138>
- 709 Wang, Q., Garrity, G.M., Tiedje, J.M., Cole, J.R., 2007. Naïve Bayesian classifier for rapid  
710 assignment of rRNA sequences into the new bacterial taxonomy. *Appl. Environ.*  
711 *Microbiol.* 73, 5261–5267. <https://doi.org/10.1128/AEM.00062-07>
- 712 Wei, T., Simko, V., Levy, M., Xie, Y., Jin, Y., Zemla, J., 2017. Visualization of a  
713 Correlation Matrix.
- 714 Westerberg, K., Elväng, A.M., Stackebrandt, E., Jansson, J.K., 2000. *Arthrobacter*  
715 *chlorophenolicus* sp. nov., a new species capable of degrading high concentrations of  
716 4-chlorophenol. *Int. J. Syst. Evol. Microbiol.* 50 Pt 6, 2083–92.  
717 <https://doi.org/10.1099/00207713-50-6-2083>



- 718 Whiting, S.N., de Souza, M.P., Terry, N., 2001. Rhizosphere bacteria mobilize Zn for  
719 hyperaccumulation by *Thlaspi caerulescens*. Environ. Sci. Technol. 35, 3144–50.
- 720 Wickham, H., 2009. ggplot2: Elegant graphics for Data Analysis, 2nd ed. Springer  
721 Publishing Company.
- 722 Wu, Z., Lin, W., Li, J., Liu, J., Li, B., Wu, L., Fang, C., Zhang, Z., 2016. Effects of seasonal  
723 variations on soil microbial community composition of two typical zonal vegetation  
724 types in the Wuyi Mountains. J. Mt. Sci. 13, 1056–1065.  
725 <https://doi.org/10.1007/s11629-015-3599-2>  
726

727 **Tables**

728

729 **Table 1 PERMANOVA model output of the effects of farming systems, date of**  
 730 **sampling and their interactions on soil microbial communities for OTUs at a 97%**  
 731 **genetic cutoff.**

732

| Jaccard Similarity (unweighted)      |    |           |         |         |         |        |     |
|--------------------------------------|----|-----------|---------|---------|---------|--------|-----|
|                                      | Df | SumsOfSqs | MeanSqs | F.Model | R2      | Pr(>F) |     |
| Farming                              | 2  | 0.8421    | 0.42103 | 1.36298 | 0.06524 | 0.0001 | *** |
| Date                                 | 4  | 1.4228    | 0.3557  | 1.15148 | 0.11024 | 0.0009 | *** |
| Farming:Date                         | 8  | 2.3009    | 0.28761 | 0.93107 | 0.17828 | 0.5954 |     |
| Residuals                            | 27 | 8.3404    | 0.3089  |         | 0.64624 |        |     |
| Total                                | 41 | 12.9061   |         |         | 1       |        |     |
| Bray-Curtis Dissimilarity (weighted) |    |           |         |         |         |        |     |
|                                      | Df | SumsOfSqs | MeanSqs | F.Model | R2      | Pr(>F) |     |
| Farming                              | 2  | 0.6692    | 0.33458 | 1.66846 | 0.07503 | 0.0002 | **  |
| Date                                 | 4  | 1.2354    | 0.30886 | 1.54019 | 0.13852 | 0.0001 | **  |
| Farming:Date                         | 8  | 1.5995    | 0.19994 | 0.99705 | 0.17935 | 0.477  |     |
| Residuals                            | 27 | 5.4144    | 0.20053 |         | 0.60709 |        |     |
| Total                                | 41 | 8.9185    |         |         | 1       |        |     |

733

734 **Figure Legends**

735

736 **Figure 1 Relative abundance of bacterial phyla in soil from conventional (CNT),**  
737 **organic grazed (OG), and organic tilled (OT) systems during the 2016 growing season.**  
738 **Samples are grouped along the x-axis by farming system, and sorted by sampling date**  
739 **within the growing season.**

740

741 **Figure 2 Soil bacterial communities' A) richness, B) evenness and C) diversity indices**  
742 **for from conventional (CNT, red), organic tilled (OT, blue) systems , and organic**  
743 **grazed (OG, green). Error bars show Standard Error of Means (SEM) for n = 3**  
744 **samples per time point and farming system.**

745

746 **Figure 3 Non-Metric Multidimensional Scaling (NMDS) of Bray-Curtis dissimilarity**  
747 **for soil bacterial communities from conventional (CNT), organic tilled (OT), and**  
748 **organic grazed (OG) systems, over the 2016 growing season.**

749

750 **Figure 4 Relative abundance of 97% cutoff OTUs discriminatory to farming system**  
751 **[conventional (CNT), organic grazed (OG), and organic tilled (OT)], over the 2016**  
752 **growing season. Samples are sorted along the x-axis by farming system and then by**  
753 **time.**

754

755 **Figure 5 (A) Rarefied abundance of putative nitrogen-fixing bacterial genera in soil**  
756 **from conventional (CNT), organic grazed (OG), and organic tilled (OT) farming**

757 **systems, over the 2016 growing season. (B) Importance of putative-nitrogen fixing**  
758 **species in discriminating between farming system. (C) Importance of factors in**  
759 **explaining abundance of *Arthrobacter* species in agricultural soil, including biomass**  
760 **or plot coverage (cov) of plants at different times, as well as minimum or maximum**  
761 **soil temperature (T).**

762

763 **Figure 6 Distance-based redundancy analysis (dbRDA) of significant factors**  
764 **determining Hellinger-transformed soil microbial community data from**  
765 **conventional (CNT, red), organic grazed (OG, green), and organic tilled (OT, blue)**  
766 **systems. The model was significant: ANOVA,  $F = 1.4191$ ,  $p = 0.001$ , as were the axes:**  
767 **CAP1,  $F = 6.9957$ ,  $p = 0.002$ ; CAP2,  $F = 6.5696$ ,  $p = 0.002$ . Significant factors**  
768 **(ANOVA,  $p < 0.05$ ) are listed in the main text.**

769

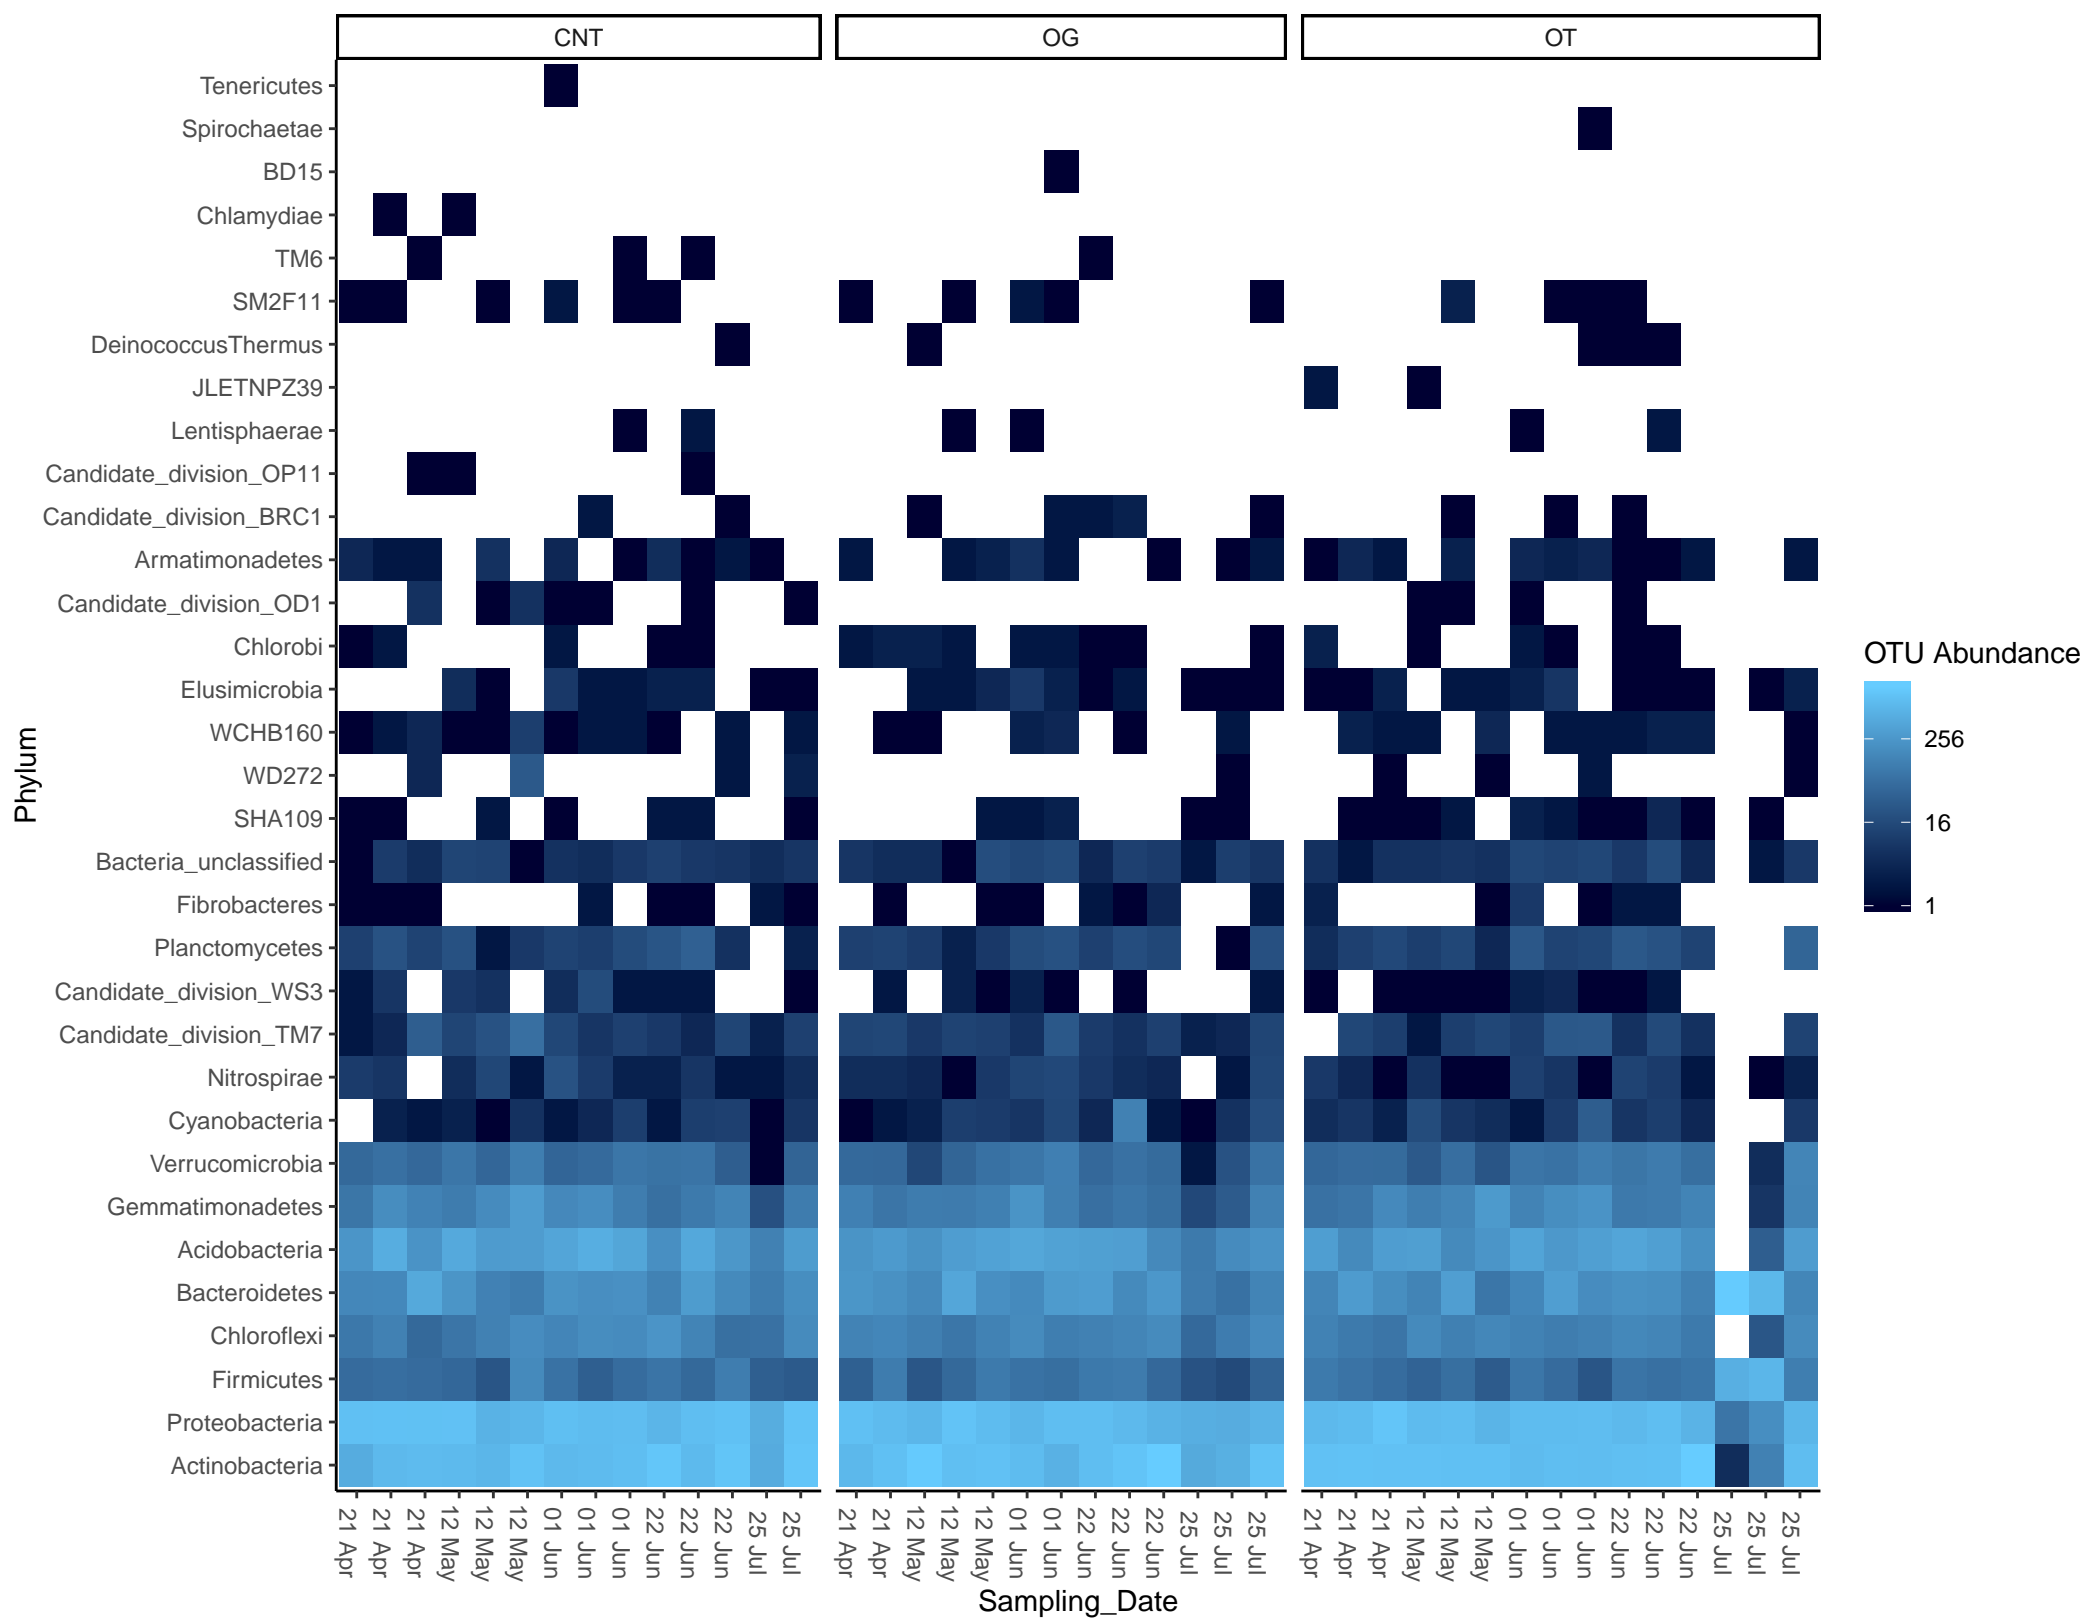

Farming ● CNT ● OG ● OT

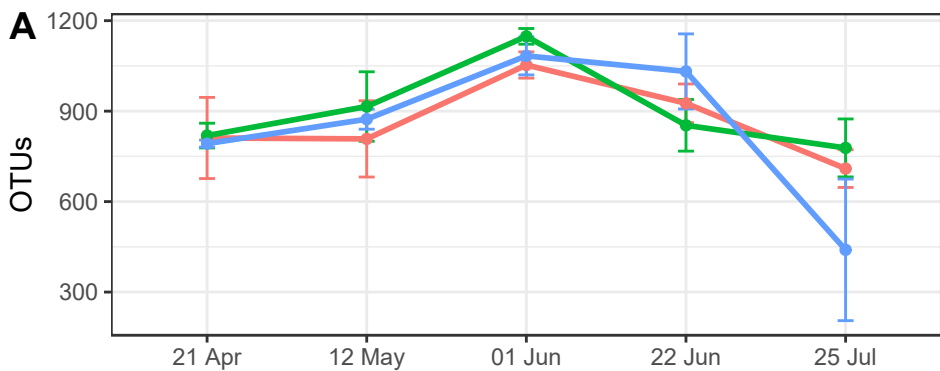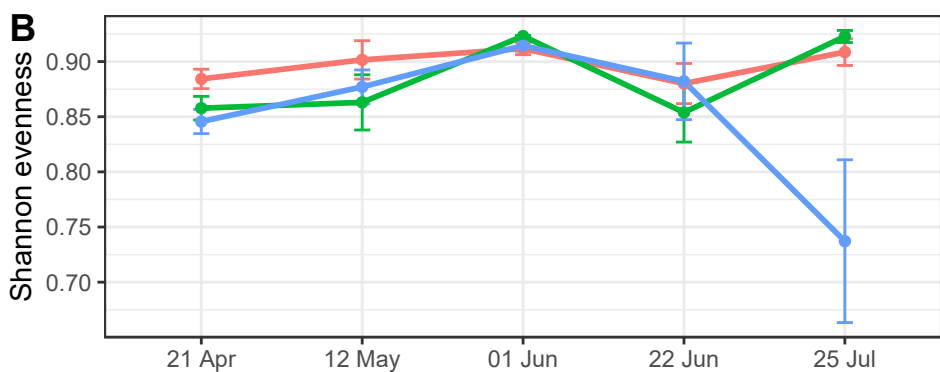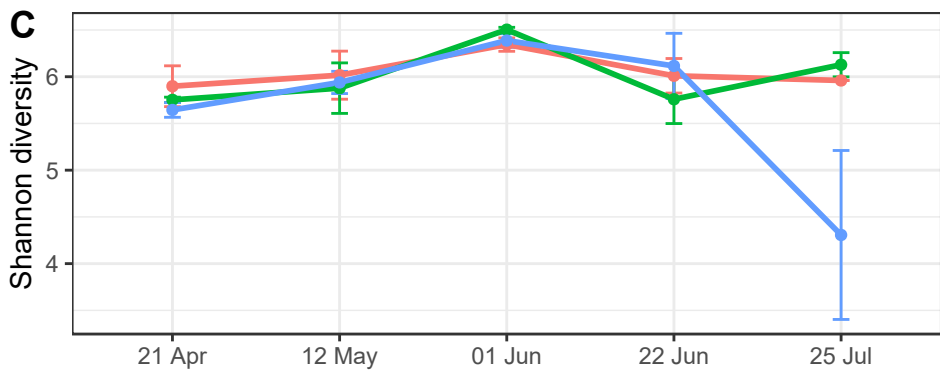

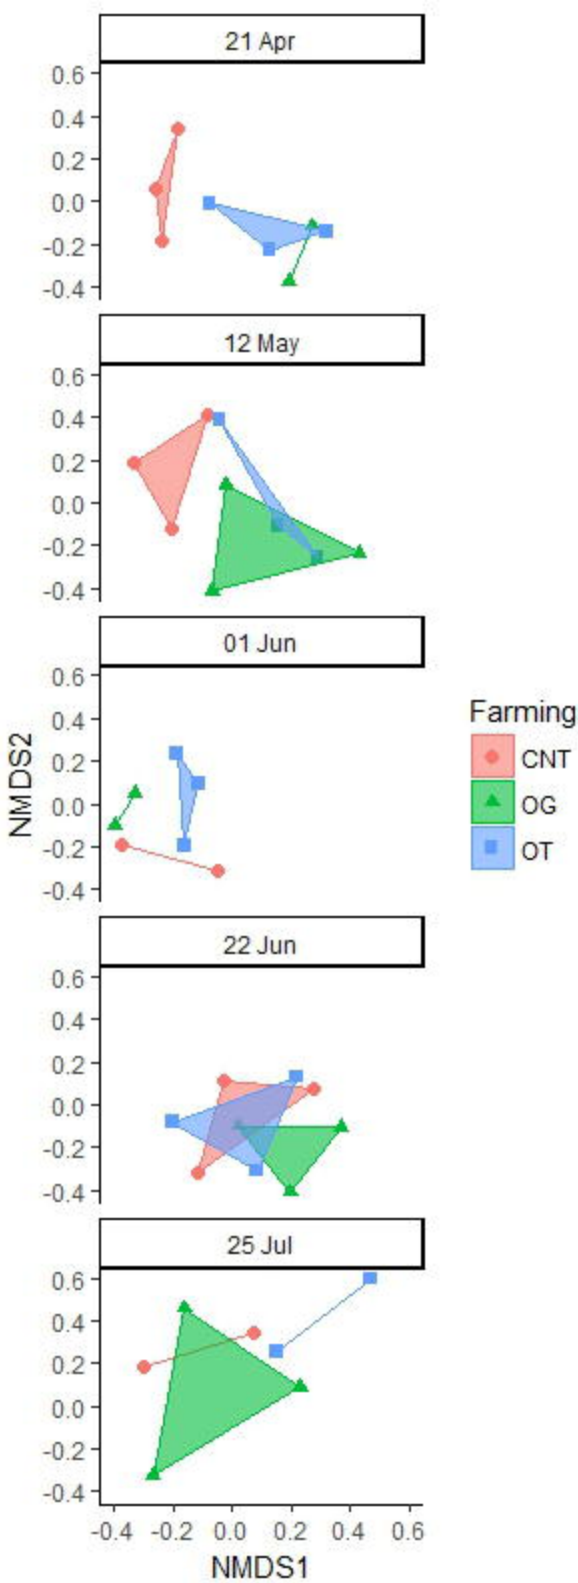

CNT

OG

OT

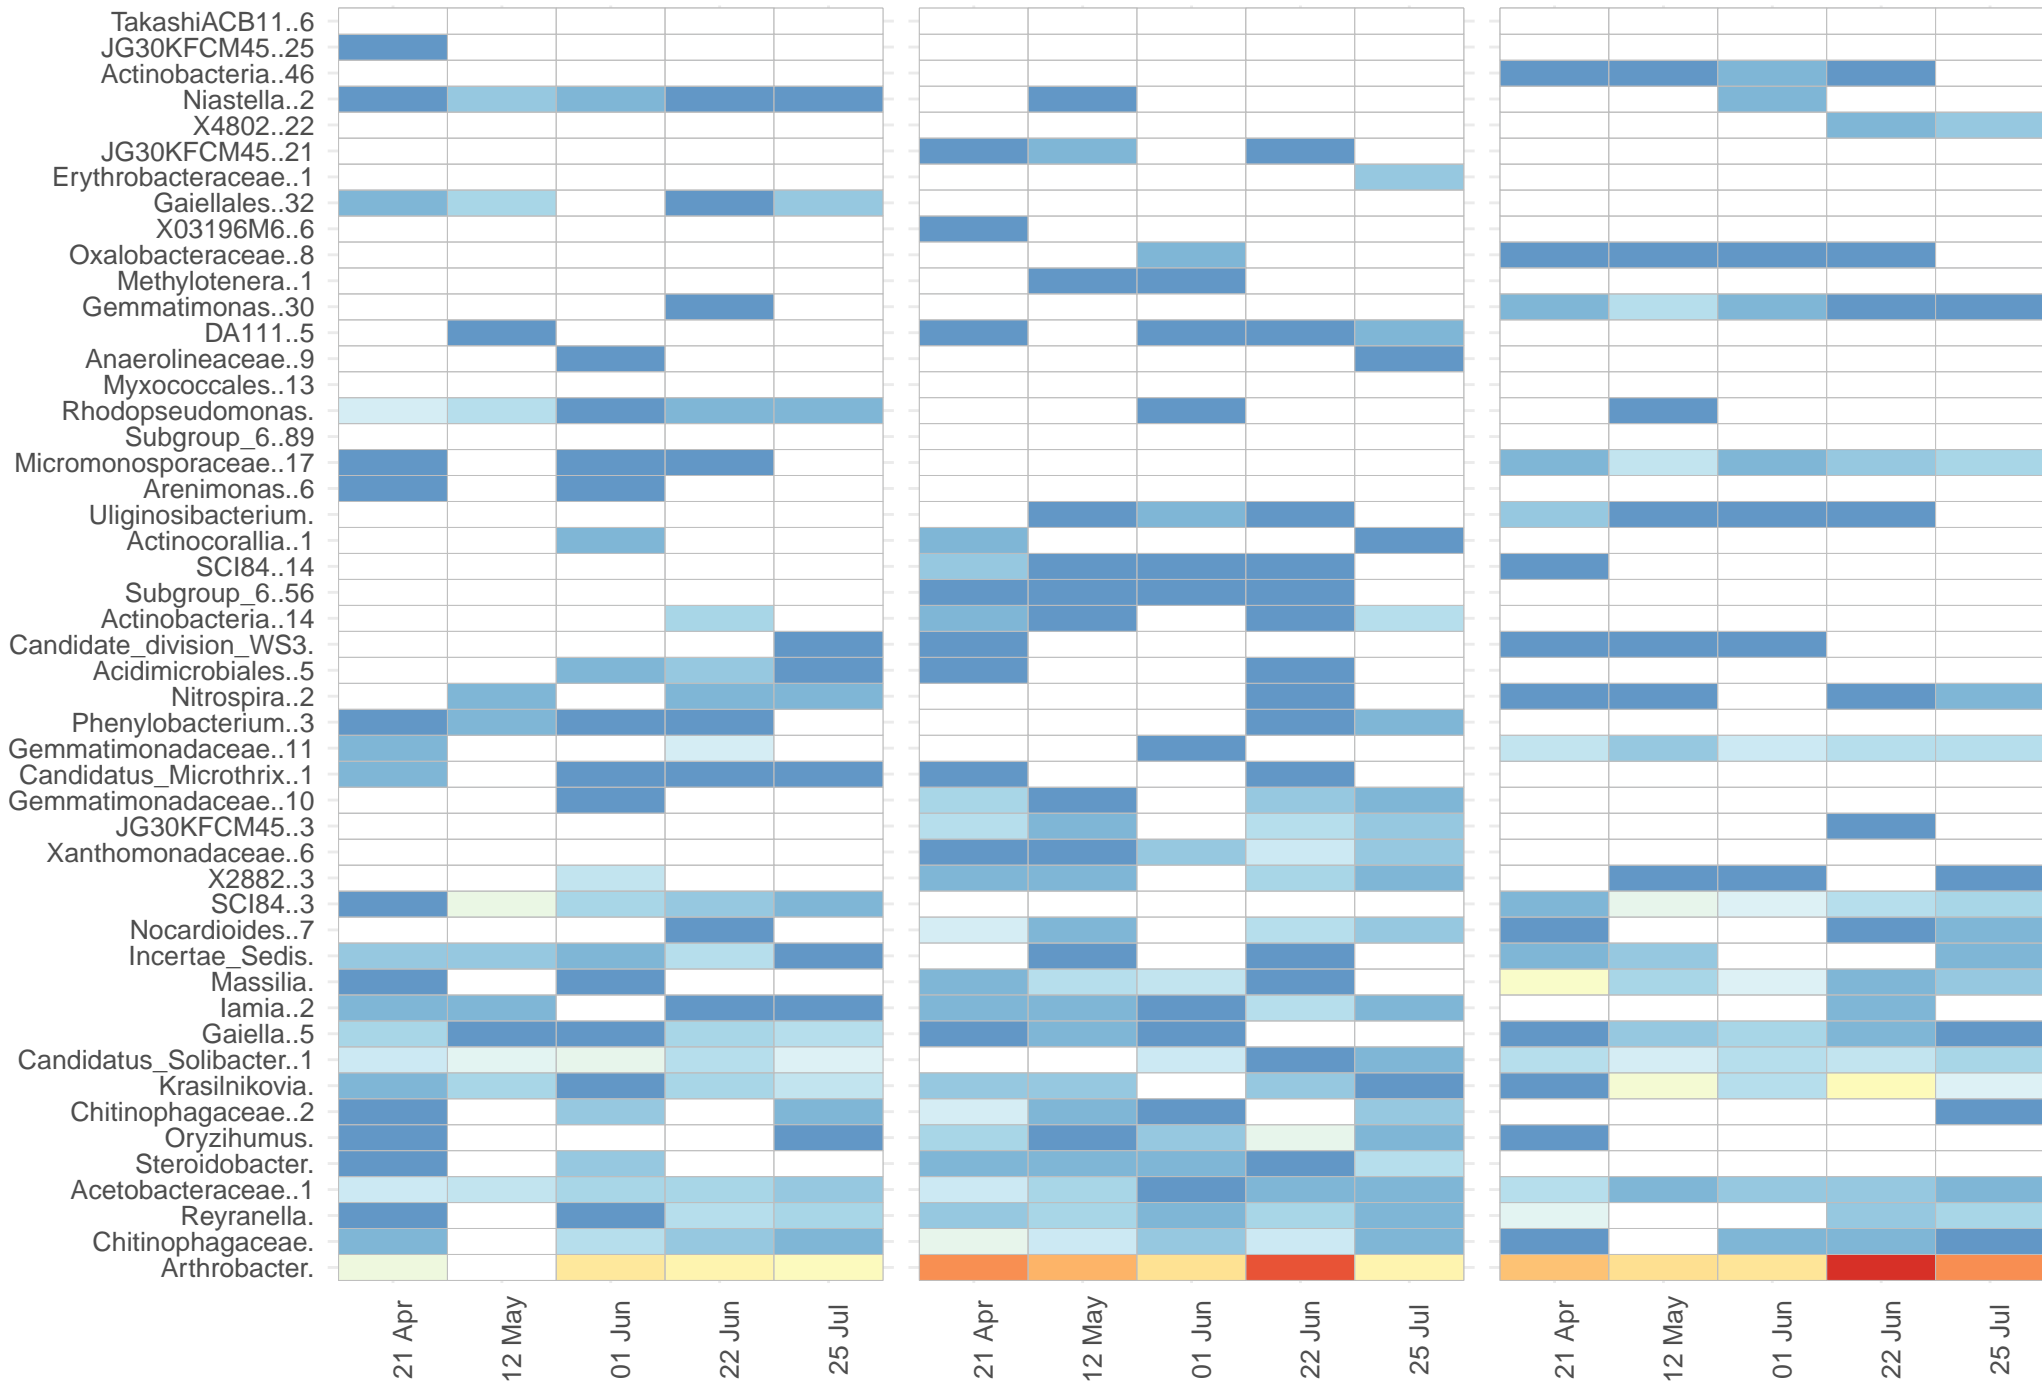

Log Relative Abundance

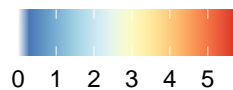



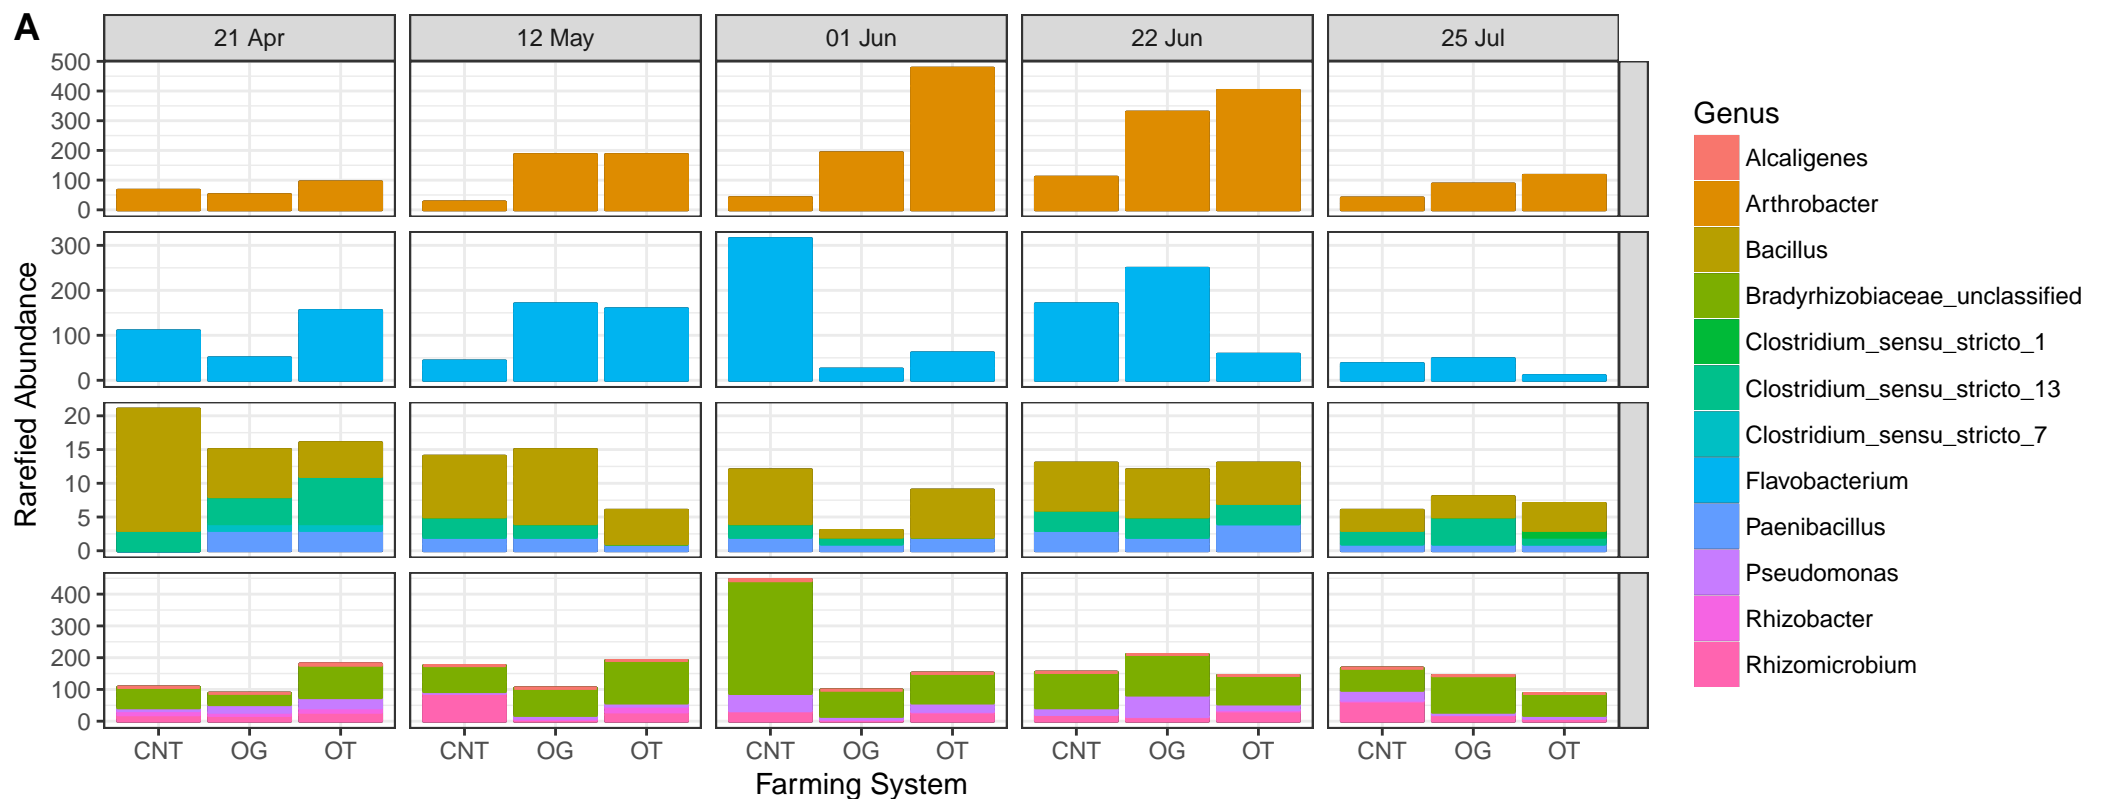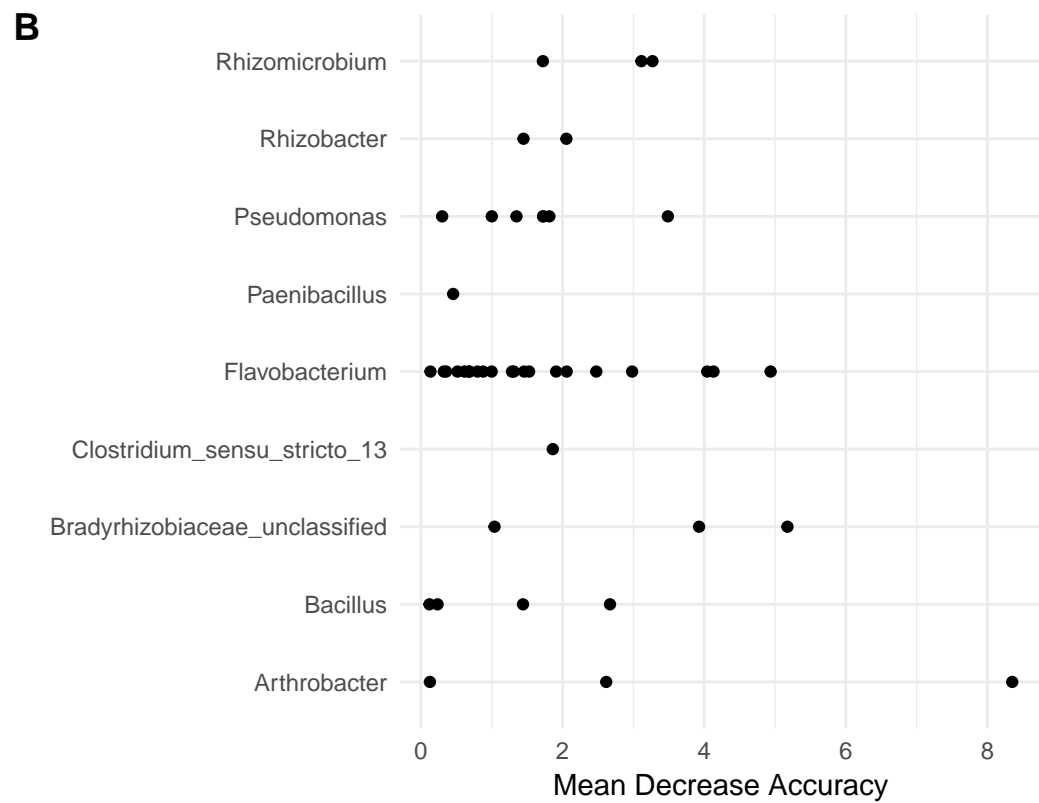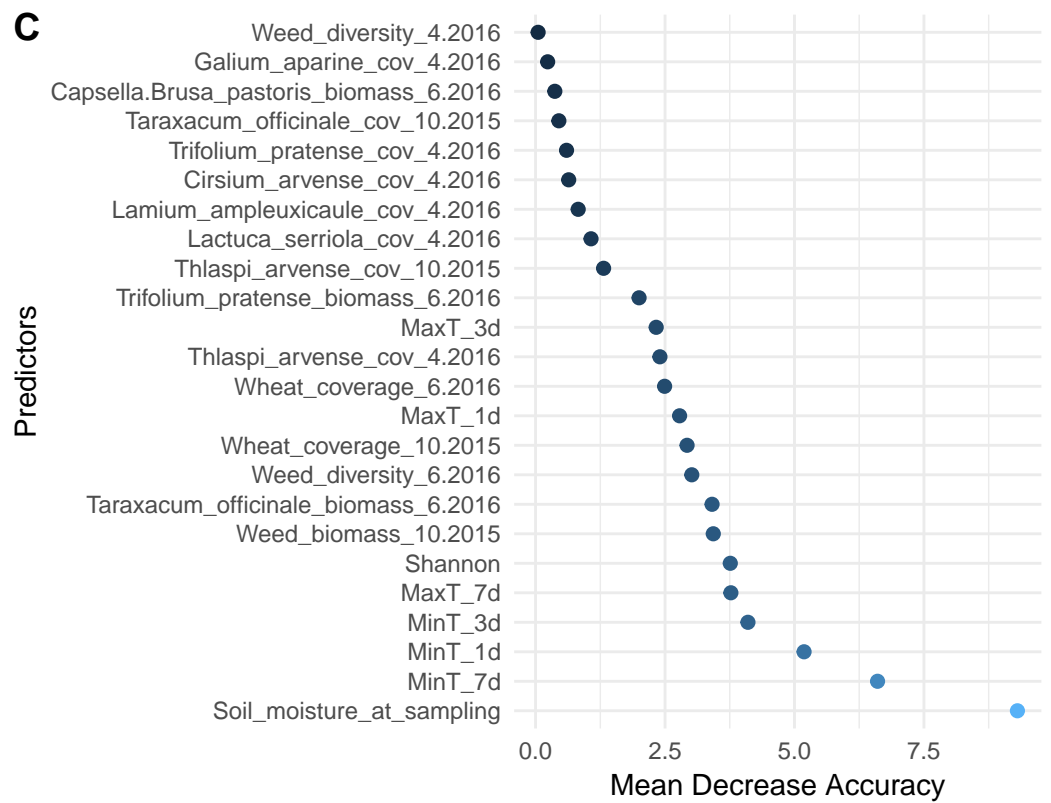

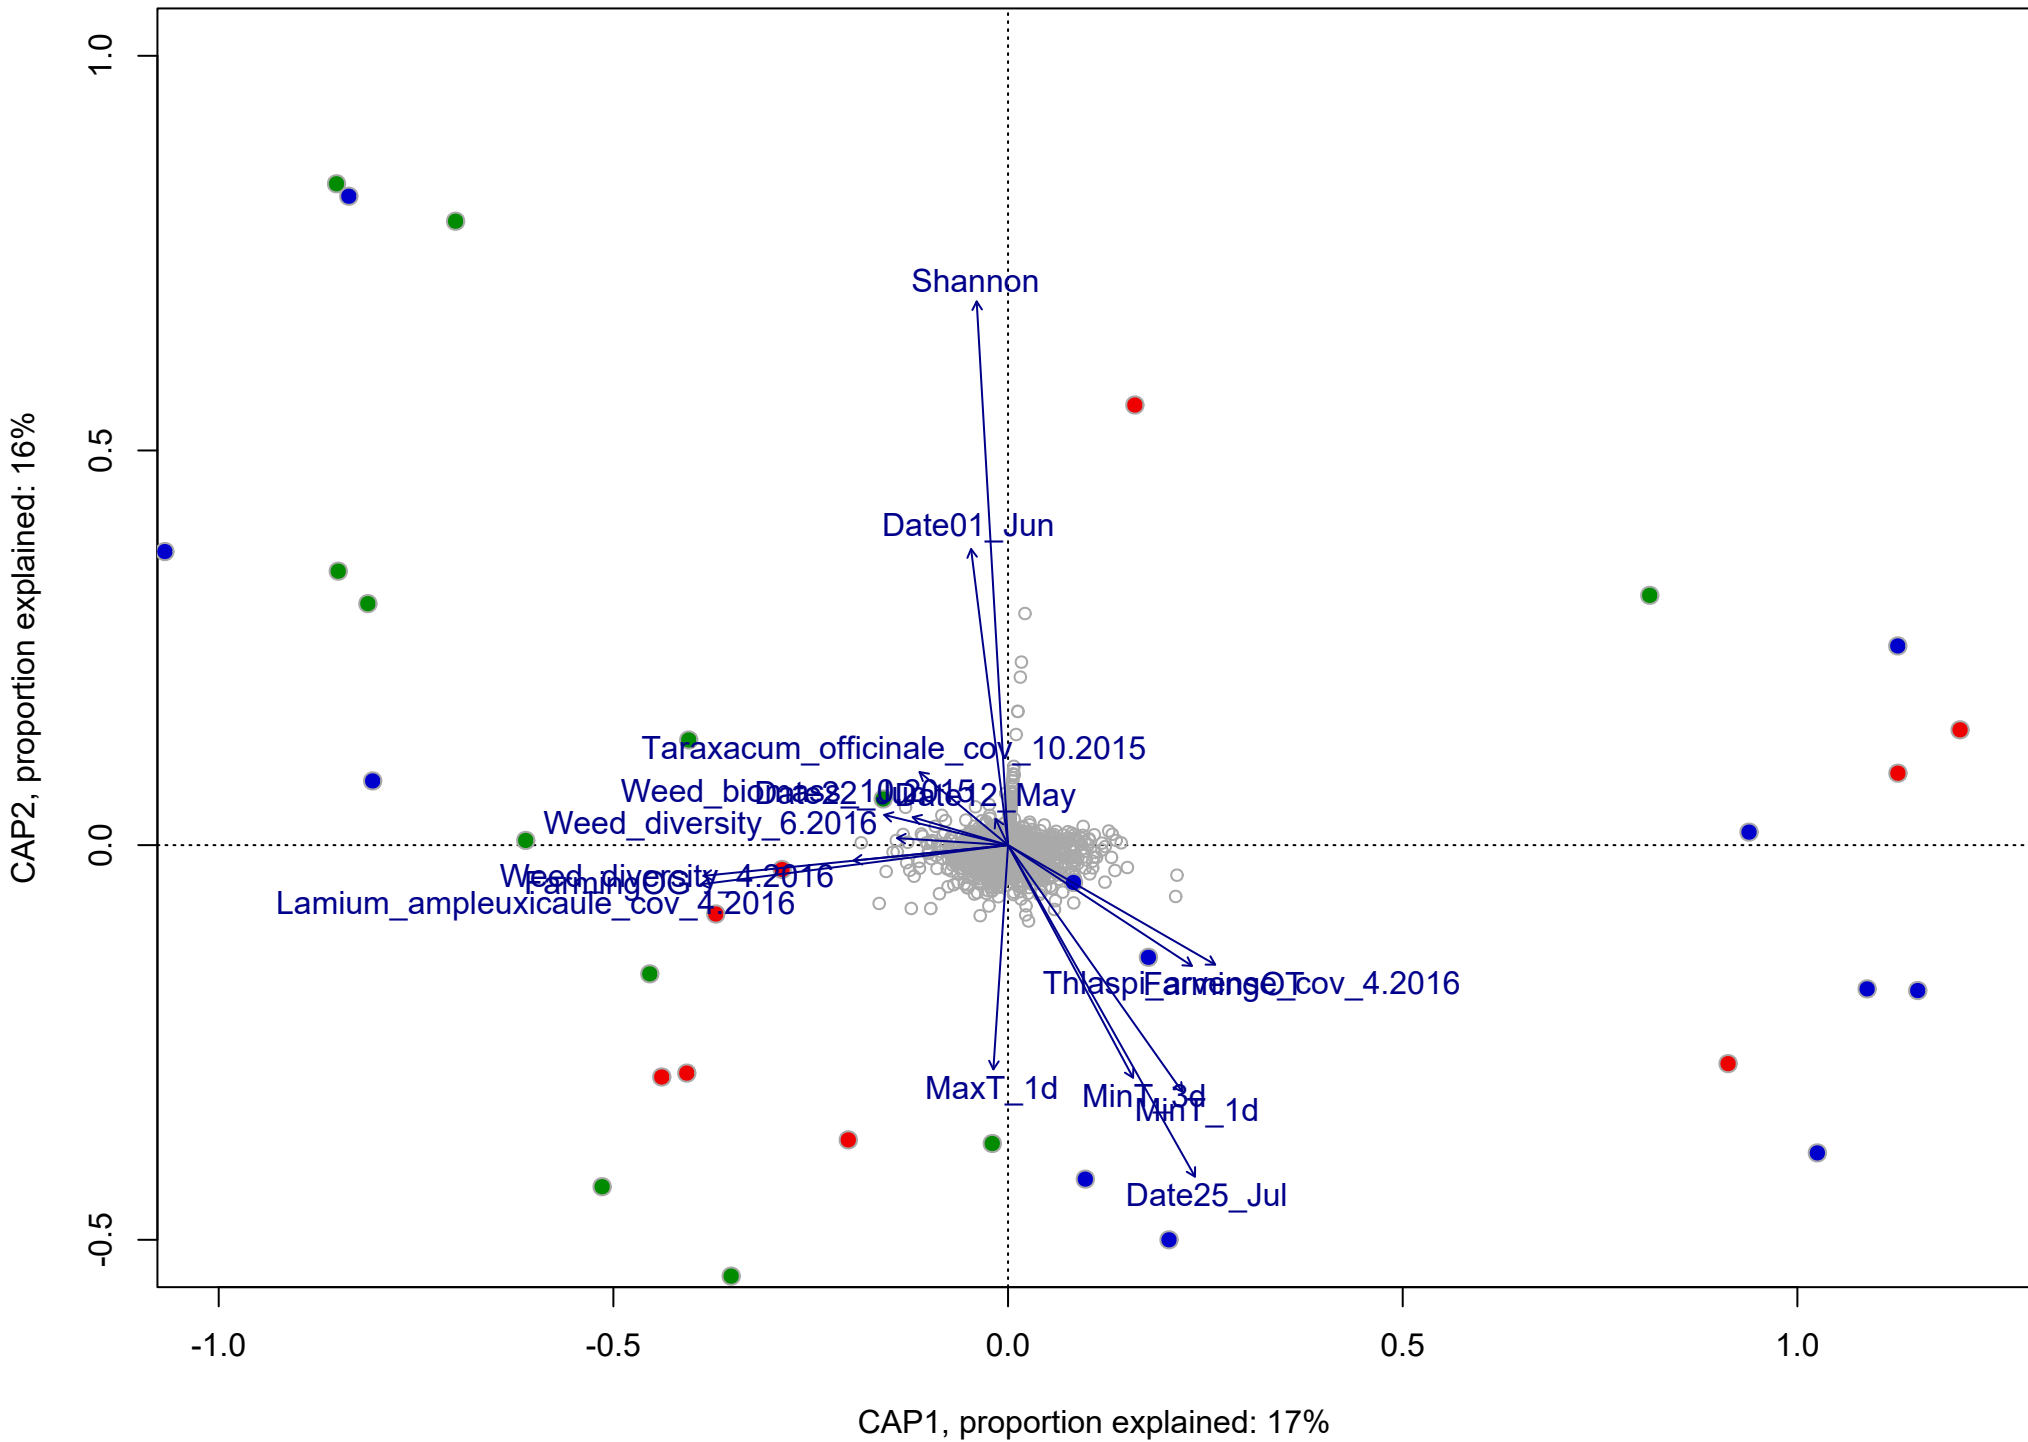

Source: https://www.biorxiv.org/content/10.1101/700740v1.full.pdf
